# Supplementary material for: Quantitatively estimating main soil water-soluble salt ions content based on Visible-near infrared wavelength selected using GC, SR and VIP
Source: PeerJ. 2019 Jan 22;7:e6310. doi: 10.7717/peerj.6310 (PMC6346982; doi:10.7717/peerj.6310)
Supplement: Supplemental Information 1 [file peerj-07-6310-s001.xlsx]

## Sheet: R
Samples	400	401	402	403	404	405	406	407	408	409	410	411	412	413	414	415	416	417	418	419	420	421	422	423	424	425	426	427	428	429	430	431	432	433	434	435	436	437	438	439	440	441	442	443	444	445	446	447	448
1	0.11513	0.11684	0.11762	0.11749	0.11738	0.11784	0.11875	0.11963	0.12003	0.11994	0.11998	0.12053	0.12143	0.12219	0.12272	0.12307	0.12335	0.12343	0.12366	0.12455	0.12624	0.1275	0.12801	0.12832	0.12875	0.12932	0.13002	0.13064	0.13133	0.13263	0.134	0.1342	0.13453	0.13529	0.13586	0.13599	0.13675	0.13805	0.1392	0.14019	0.14088	0.14137	0.14203	0.14314	0.14416	0.14466	0.14504	0.14577	0.14659
2	0.11802	0.11795	0.11897	0.12052	0.12126	0.1209	0.12112	0.12182	0.12198	0.12162	0.12239	0.12413	0.12536	0.12591	0.12627	0.12677	0.12746	0.12808	0.1283	0.12838	0.12897	0.13021	0.13165	0.13249	0.13224	0.13261	0.13408	0.13546	0.13641	0.13743	0.13834	0.13859	0.13913	0.13995	0.14063	0.1412	0.14231	0.14358	0.14433	0.14521	0.14631	0.14711	0.14741	0.14806	0.14889	0.14975	0.15098	0.15201	0.15264
3	0.10909	0.1106	0.1119	0.11221	0.11191	0.11227	0.11333	0.11394	0.11341	0.11343	0.11469	0.11598	0.11604	0.11627	0.11684	0.11752	0.11836	0.11897	0.11933	0.11997	0.12134	0.12217	0.12207	0.12178	0.12262	0.12405	0.12524	0.12603	0.12703	0.12806	0.12884	0.12924	0.12959	0.13021	0.131	0.13152	0.13228	0.13338	0.13448	0.1355	0.1366	0.13756	0.13804	0.13854	0.13937	0.1404	0.14123	0.14191	0.14267
4	0.12891	0.12987	0.13008	0.13014	0.13074	0.13123	0.13218	0.13346	0.13411	0.13387	0.13474	0.13631	0.137	0.13751	0.13783	0.13791	0.13814	0.13893	0.14004	0.14108	0.14174	0.14207	0.14279	0.14409	0.14472	0.14516	0.14598	0.14701	0.14793	0.14873	0.14917	0.14919	0.14996	0.15164	0.15352	0.15449	0.155	0.15575	0.15687	0.15785	0.15854	0.15905	0.15989	0.161	0.16205	0.16299	0.16401	0.16471	0.16528
5	0.13088	0.13068	0.131	0.132	0.13297	0.13345	0.13382	0.13416	0.13449	0.13482	0.13534	0.13622	0.13706	0.13672	0.13662	0.13765	0.13881	0.13932	0.14029	0.14216	0.14344	0.14352	0.14314	0.14339	0.14425	0.14559	0.14691	0.14756	0.14766	0.14809	0.14908	0.15008	0.15091	0.15184	0.15299	0.15389	0.15468	0.15572	0.157	0.15795	0.15861	0.15923	0.16001	0.16103	0.16221	0.16337	0.16421	0.16467	0.16521
6	0.13685	0.13559	0.13668	0.13916	0.14033	0.1393	0.13917	0.14064	0.14218	0.14178	0.14122	0.14231	0.14463	0.14533	0.14523	0.14584	0.14744	0.14852	0.14856	0.14826	0.149	0.15085	0.1525	0.15274	0.15185	0.15187	0.15321	0.15436	0.15459	0.155	0.15625	0.15791	0.15925	0.15993	0.16036	0.16126	0.16223	0.16294	0.16355	0.16473	0.16617	0.16732	0.168	0.16846	0.16898	0.16985	0.17109	0.17184	0.1724
7	0.13066	0.13041	0.12947	0.12929	0.13027	0.1308	0.13106	0.13188	0.13344	0.13468	0.1353	0.13548	0.1356	0.13558	0.13597	0.13715	0.1386	0.1391	0.13902	0.13942	0.14092	0.14157	0.14135	0.14189	0.1439	0.14534	0.14577	0.14622	0.14713	0.14811	0.14862	0.14864	0.14912	0.15001	0.15086	0.1518	0.15313	0.15425	0.15464	0.15522	0.15614	0.15703	0.15764	0.15867	0.15999	0.16112	0.16177	0.16246	0.16327
8	0.12633	0.12676	0.12802	0.12941	0.13019	0.13045	0.1308	0.13144	0.13237	0.13362	0.1342	0.13431	0.13494	0.13601	0.13642	0.13623	0.13664	0.13772	0.13858	0.13889	0.13965	0.14063	0.14133	0.14177	0.14253	0.14376	0.14511	0.14585	0.146	0.14629	0.14694	0.14768	0.14862	0.14954	0.1504	0.15148	0.15281	0.15396	0.15448	0.15475	0.15543	0.15647	0.15735	0.15826	0.15925	0.16019	0.16091	0.1614	0.16194
9	0.12747	0.12812	0.12924	0.12983	0.12971	0.13011	0.13095	0.13174	0.13231	0.13303	0.13347	0.13367	0.13403	0.13434	0.1349	0.13595	0.13705	0.13773	0.13837	0.13934	0.14061	0.14128	0.14147	0.14211	0.14329	0.14388	0.14425	0.14542	0.14631	0.14657	0.14669	0.14732	0.14818	0.14925	0.15046	0.15149	0.15259	0.15388	0.15512	0.15608	0.15657	0.15691	0.15783	0.15904	0.15991	0.16056	0.16166	0.16234	0.1627
10	0.12982	0.13112	0.13235	0.13254	0.13243	0.13306	0.13329	0.13348	0.13407	0.13415	0.1348	0.13623	0.1373	0.13728	0.1374	0.13827	0.13929	0.13985	0.14045	0.14155	0.14246	0.14255	0.14286	0.1442	0.14533	0.14609	0.14672	0.14719	0.14719	0.1476	0.14874	0.14983	0.15072	0.15165	0.15276	0.15376	0.15474	0.15555	0.15605	0.15649	0.15736	0.15862	0.15974	0.16053	0.16139	0.1624	0.1631	0.16354	0.16408
11	0.1241	0.12418	0.1256	0.1272	0.12811	0.12892	0.12903	0.12883	0.12909	0.12958	0.13007	0.13049	0.13072	0.13152	0.13296	0.13424	0.135	0.13603	0.13664	0.13667	0.13726	0.13836	0.13942	0.14014	0.14117	0.14224	0.14281	0.14283	0.14292	0.14351	0.14447	0.14515	0.14599	0.14735	0.14874	0.14917	0.14963	0.15063	0.15183	0.15243	0.15295	0.15384	0.15486	0.15556	0.1563	0.15727	0.15802	0.15856	0.15907
12	0.12874	0.12913	0.12849	0.12851	0.12995	0.13145	0.13219	0.13236	0.13267	0.13349	0.13409	0.13417	0.13432	0.13526	0.13638	0.13707	0.1373	0.13785	0.13918	0.14074	0.14136	0.14137	0.14161	0.1426	0.14404	0.14456	0.14429	0.14477	0.14604	0.14684	0.14703	0.14767	0.14897	0.1504	0.15123	0.1514	0.15217	0.15356	0.15465	0.15509	0.15585	0.1573	0.15885	0.15966	0.16011	0.16081	0.16161	0.16206	0.1625
13	0.13612	0.13578	0.13647	0.13759	0.13808	0.13895	0.13955	0.13947	0.13962	0.14115	0.14229	0.1427	0.14312	0.14373	0.14416	0.14439	0.14519	0.14691	0.14827	0.1485	0.14843	0.14898	0.15004	0.15092	0.15151	0.15235	0.1533	0.15386	0.15421	0.15477	0.15561	0.15639	0.15749	0.15875	0.15983	0.16089	0.16201	0.16269	0.16287	0.16347	0.16486	0.16664	0.16788	0.16849	0.16888	0.16928	0.16971	0.17082	0.1723
14	0.13047	0.13176	0.13202	0.13211	0.13302	0.13397	0.13467	0.13524	0.13563	0.13599	0.13679	0.13771	0.13837	0.13867	0.13877	0.13934	0.14063	0.14097	0.14101	0.14188	0.14334	0.144	0.1442	0.1449	0.14578	0.14612	0.1463	0.14719	0.14807	0.14886	0.14981	0.15083	0.15129	0.15222	0.1541	0.15525	0.15532	0.15556	0.15697	0.15827	0.15911	0.1598	0.16073	0.16185	0.16286	0.16343	0.16366	0.1642	0.16519
15	0.12831	0.12983	0.13016	0.12973	0.12983	0.13084	0.13146	0.13187	0.13261	0.13293	0.13294	0.13343	0.13479	0.1358	0.13638	0.13695	0.13768	0.13835	0.13904	0.13973	0.14017	0.14077	0.14141	0.14184	0.14251	0.14356	0.14452	0.14503	0.14558	0.14637	0.14717	0.14751	0.148	0.14896	0.15004	0.15082	0.15188	0.15302	0.15372	0.15418	0.15478	0.15584	0.15744	0.15882	0.1596	0.16	0.16047	0.16107	0.16185
16	0.1349	0.13608	0.13667	0.13718	0.13803	0.13829	0.13873	0.13938	0.13979	0.1404	0.14205	0.14352	0.1435	0.14361	0.14431	0.14534	0.14641	0.14702	0.14752	0.14844	0.14945	0.14994	0.15014	0.15044	0.15107	0.15216	0.15314	0.1536	0.15386	0.15438	0.15531	0.15613	0.15669	0.15764	0.15916	0.16046	0.16162	0.16253	0.16306	0.16368	0.16459	0.16561	0.16655	0.1678	0.16902	0.16984	0.17034	0.17073	0.17113
17	0.12306	0.12388	0.12458	0.12496	0.1254	0.12662	0.12708	0.12666	0.12641	0.1269	0.12781	0.12888	0.12965	0.12941	0.12972	0.13103	0.13189	0.13238	0.13315	0.13413	0.13467	0.13539	0.13612	0.13657	0.13704	0.13778	0.1386	0.13909	0.13945	0.13995	0.14052	0.1409	0.14195	0.14331	0.14418	0.14468	0.14539	0.14627	0.14715	0.14818	0.14902	0.14967	0.15043	0.15148	0.15247	0.15307	0.15353	0.15417	0.15491
18	0.12398	0.12506	0.12685	0.12824	0.12859	0.12793	0.12786	0.12916	0.13079	0.131	0.13108	0.13151	0.13179	0.13218	0.13307	0.13398	0.13415	0.13447	0.13542	0.13662	0.13708	0.13757	0.13858	0.13976	0.13994	0.13996	0.14081	0.14244	0.14307	0.14299	0.14322	0.14406	0.14503	0.14602	0.14698	0.14783	0.1487	0.14956	0.15038	0.15098	0.15162	0.1526	0.15376	0.15454	0.15524	0.15613	0.157	0.1576	0.1581
19	0.11509	0.11454	0.1139	0.11422	0.11521	0.11589	0.11639	0.11669	0.11694	0.11758	0.11817	0.11853	0.11882	0.11909	0.11962	0.12034	0.12074	0.12099	0.12152	0.12228	0.12271	0.1232	0.12381	0.12452	0.12572	0.12668	0.12705	0.12742	0.12834	0.12905	0.12925	0.12946	0.13016	0.13111	0.13179	0.13219	0.133	0.13406	0.13486	0.13555	0.13642	0.13753	0.13865	0.13912	0.13925	0.13974	0.14085	0.14178	0.14234
20	0.12825	0.12788	0.12777	0.12836	0.12931	0.13005	0.13063	0.13075	0.13045	0.13107	0.13292	0.13408	0.13314	0.133	0.13425	0.1356	0.13578	0.13627	0.13747	0.1387	0.13895	0.13917	0.1402	0.14164	0.14201	0.142	0.14232	0.14299	0.14345	0.14416	0.14532	0.1464	0.14703	0.14757	0.14837	0.14926	0.15011	0.15101	0.1521	0.15325	0.15405	0.15455	0.15518	0.15604	0.15694	0.15777	0.15862	0.15939	0.16005
21	0.13158	0.13198	0.13178	0.13256	0.1344	0.13514	0.13534	0.13576	0.13644	0.137	0.13756	0.13816	0.13902	0.14043	0.14111	0.14114	0.1422	0.1439	0.14455	0.14392	0.14396	0.14463	0.14563	0.14673	0.14751	0.14752	0.14764	0.14886	0.14991	0.15092	0.15215	0.15297	0.15324	0.15385	0.15496	0.1556	0.15658	0.15783	0.15869	0.15928	0.16024	0.1615	0.16253	0.16349	0.16435	0.165	0.16543	0.1662	0.16722
22	0.12662	0.12766	0.12961	0.1305	0.12975	0.12908	0.12945	0.13072	0.13197	0.13214	0.13137	0.13116	0.1326	0.13406	0.13481	0.13539	0.13653	0.13734	0.13785	0.13828	0.13853	0.13915	0.14058	0.14223	0.14208	0.14169	0.14241	0.14367	0.14388	0.14399	0.14482	0.14615	0.14734	0.14793	0.14823	0.14919	0.15048	0.15159	0.1524	0.15288	0.15335	0.15416	0.15524	0.15632	0.15728	0.15802	0.15866	0.15929	0.15987
23	0.11105	0.11131	0.11103	0.11107	0.11199	0.11302	0.11421	0.11508	0.1151	0.11522	0.11608	0.11682	0.11687	0.1176	0.11827	0.11829	0.11789	0.11798	0.11883	0.11988	0.12025	0.1209	0.12211	0.12325	0.12374	0.12418	0.12487	0.12569	0.12619	0.1266	0.12749	0.12903	0.1304	0.131	0.13089	0.13083	0.13154	0.13284	0.1341	0.13497	0.13557	0.13621	0.13705	0.13803	0.1388	0.13917	0.13944	0.14031	0.14146
24	0.12168	0.12352	0.12565	0.12598	0.12471	0.12481	0.12632	0.12714	0.1263	0.12642	0.12783	0.12912	0.12918	0.12926	0.13011	0.13129	0.13165	0.13167	0.13197	0.13265	0.13339	0.13452	0.13538	0.13545	0.13566	0.13686	0.13838	0.13908	0.14007	0.14118	0.14174	0.14194	0.14285	0.1438	0.14421	0.14475	0.14568	0.14673	0.14763	0.14892	0.15006	0.1506	0.15094	0.15159	0.15228	0.15304	0.15421	0.15533	0.1562
25	0.13561	0.13587	0.1357	0.13617	0.13787	0.13922	0.13814	0.13667	0.13734	0.13923	0.14018	0.13981	0.13959	0.14065	0.14199	0.14274	0.14304	0.14303	0.14359	0.14487	0.14536	0.14565	0.14695	0.14901	0.1498	0.15006	0.15063	0.15167	0.15263	0.15297	0.153	0.15371	0.15492	0.15576	0.15599	0.15659	0.15797	0.15976	0.16117	0.16169	0.16187	0.16249	0.16378	0.16475	0.16519	0.16567	0.167	0.16833	0.16914
26	0.13091	0.13005	0.12964	0.13035	0.13124	0.1312	0.13196	0.13289	0.13286	0.13313	0.13418	0.13491	0.13457	0.13512	0.13638	0.13756	0.13839	0.13889	0.13937	0.14015	0.14107	0.14157	0.14232	0.14372	0.14431	0.14445	0.14519	0.14672	0.14769	0.14816	0.14877	0.15009	0.15128	0.15201	0.15262	0.15345	0.15435	0.1554	0.15646	0.15729	0.15806	0.15876	0.15939	0.1603	0.16147	0.16258	0.16326	0.1638	0.16456
27	0.11765	0.1172	0.11722	0.11765	0.11855	0.11999	0.12082	0.1213	0.12223	0.12379	0.12476	0.12458	0.12399	0.12443	0.12533	0.12589	0.12609	0.12666	0.12722	0.12746	0.128	0.12928	0.13026	0.1301	0.13012	0.13138	0.13318	0.13418	0.13468	0.13524	0.13605	0.13699	0.13782	0.13837	0.13885	0.13986	0.14078	0.14139	0.14207	0.14312	0.14426	0.14532	0.14619	0.14658	0.14687	0.14752	0.14851	0.14946	0.15016
28	0.13134	0.13228	0.13338	0.13395	0.13411	0.13488	0.13609	0.13707	0.13726	0.13685	0.13703	0.1378	0.13841	0.13972	0.14144	0.1426	0.14303	0.14342	0.14351	0.14349	0.14421	0.1454	0.14626	0.14647	0.14755	0.14938	0.15064	0.15077	0.15134	0.15231	0.15327	0.15398	0.1547	0.15563	0.15656	0.15708	0.15791	0.15928	0.16074	0.16183	0.16249	0.1631	0.16425	0.16542	0.16633	0.16718	0.16801	0.16863	0.16928
29	0.12846	0.12891	0.13041	0.132	0.13231	0.13169	0.13272	0.13421	0.13404	0.13343	0.13414	0.13577	0.13687	0.13724	0.13732	0.13795	0.13962	0.1411	0.14138	0.14078	0.14089	0.14171	0.14263	0.14338	0.14443	0.14575	0.1469	0.14751	0.14833	0.14908	0.14925	0.1492	0.15028	0.15175	0.15273	0.15387	0.15494	0.15559	0.15607	0.15728	0.15869	0.15969	0.16011	0.16046	0.16127	0.16249	0.16349	0.16412	0.1647
30	0.13591	0.13628	0.13662	0.13724	0.13771	0.13665	0.13674	0.13864	0.14046	0.14052	0.14131	0.14262	0.14265	0.1424	0.14311	0.14447	0.14511	0.1459	0.14668	0.14701	0.14731	0.14879	0.15029	0.15047	0.15063	0.1513	0.15229	0.15341	0.15464	0.15532	0.15549	0.15583	0.15654	0.15766	0.15884	0.15947	0.15996	0.1609	0.16236	0.16345	0.16418	0.16497	0.16598	0.16694	0.16789	0.16878	0.16949	0.17015	0.17083
31	0.12562	0.1255	0.12414	0.12418	0.12635	0.12796	0.12778	0.12678	0.12688	0.12891	0.13116	0.13198	0.13133	0.13106	0.13177	0.1327	0.13268	0.13285	0.13359	0.13439	0.13474	0.13543	0.13637	0.13709	0.1376	0.13834	0.13946	0.14063	0.14149	0.14208	0.14258	0.14318	0.14392	0.14462	0.14523	0.14593	0.14684	0.14798	0.14921	0.15021	0.15094	0.15149	0.152	0.15259	0.15348	0.15453	0.15533	0.15601	0.15688
32	0.12053	0.12093	0.1206	0.12103	0.12279	0.12424	0.12453	0.12436	0.12467	0.12534	0.12598	0.12644	0.12694	0.12775	0.12892	0.12986	0.12969	0.12901	0.12914	0.13041	0.13162	0.13244	0.13305	0.13378	0.13468	0.13517	0.13542	0.13636	0.13824	0.13974	0.14019	0.14036	0.14114	0.14221	0.14292	0.14342	0.14391	0.14452	0.14545	0.14649	0.14725	0.14799	0.14912	0.15008	0.15075	0.15134	0.15206	0.15293	0.15371
33	0.12124	0.12139	0.12212	0.12324	0.12416	0.12476	0.12455	0.12448	0.12554	0.1266	0.12667	0.12638	0.12656	0.12656	0.127	0.12783	0.12822	0.12866	0.12991	0.13168	0.13252	0.13236	0.13254	0.134	0.13539	0.13611	0.13667	0.1377	0.13883	0.13951	0.13963	0.13997	0.14096	0.14199	0.14258	0.14312	0.14372	0.14469	0.14607	0.14717	0.14793	0.1487	0.14971	0.15036	0.15081	0.15148	0.15242	0.15327	0.15392
34	0.11695	0.11836	0.11728	0.11601	0.11695	0.11969	0.12144	0.12117	0.12023	0.12082	0.12248	0.12368	0.12328	0.12266	0.123	0.12409	0.12499	0.1256	0.12594	0.12637	0.12733	0.12786	0.12813	0.12894	0.13034	0.13095	0.13066	0.1307	0.13199	0.13326	0.13364	0.13405	0.13538	0.13671	0.13718	0.13727	0.13743	0.13818	0.13959	0.14059	0.14088	0.14134	0.14288	0.14403	0.14437	0.14455	0.14545	0.14656	0.14741
35	0.12279	0.12387	0.12381	0.1231	0.12283	0.12339	0.125	0.1265	0.12658	0.12608	0.12686	0.12826	0.12861	0.1286	0.12873	0.12947	0.13102	0.13142	0.13094	0.13117	0.13262	0.13351	0.13409	0.13509	0.13582	0.13629	0.13672	0.13741	0.13889	0.14054	0.14148	0.1416	0.1413	0.14124	0.14198	0.14317	0.14417	0.14525	0.14667	0.14774	0.14847	0.14904	0.1496	0.1505	0.15154	0.15227	0.15259	0.15351	0.15479
36	0.12471	0.12778	0.13002	0.12927	0.12719	0.12768	0.12969	0.13079	0.13014	0.13001	0.13154	0.13326	0.13292	0.13176	0.13227	0.13443	0.13577	0.13592	0.13588	0.13669	0.13849	0.13976	0.13971	0.1392	0.14012	0.14148	0.14219	0.1423	0.14298	0.14424	0.14544	0.14591	0.14588	0.14634	0.14769	0.14894	0.1498	0.15055	0.15147	0.15265	0.15368	0.15416	0.15435	0.15527	0.15653	0.15743	0.15781	0.15865	0.15983
37	0.11708	0.11986	0.12064	0.1201	0.12059	0.12218	0.12247	0.12213	0.12233	0.12228	0.12218	0.12244	0.12333	0.12445	0.12543	0.1262	0.12672	0.12722	0.12768	0.12783	0.12767	0.12848	0.12987	0.13078	0.13124	0.13194	0.13283	0.13343	0.13408	0.13461	0.13502	0.13579	0.13673	0.13751	0.13812	0.13872	0.13924	0.13998	0.14101	0.14166	0.14211	0.14283	0.14398	0.14463	0.14499	0.14563	0.14644	0.14743	0.14857
38	0.14009	0.14178	0.14222	0.14182	0.14194	0.14321	0.14395	0.14398	0.14411	0.14437	0.14472	0.14543	0.14647	0.14746	0.14822	0.14846	0.14833	0.1487	0.14963	0.15094	0.15249	0.15332	0.15355	0.1539	0.15442	0.15483	0.15525	0.15584	0.15627	0.15693	0.15795	0.1589	0.15973	0.16044	0.16103	0.16167	0.1629	0.16418	0.16475	0.16529	0.16638	0.16772	0.16868	0.16967	0.17059	0.1712	0.17142	0.17191	0.17271
39	0.14674	0.14688	0.1468	0.14719	0.14834	0.149	0.14968	0.15042	0.15088	0.15121	0.15185	0.15255	0.15308	0.154	0.1548	0.15522	0.15559	0.15627	0.15706	0.15785	0.15901	0.15996	0.16028	0.16021	0.16022	0.16097	0.16235	0.16329	0.16327	0.16321	0.16368	0.16458	0.16574	0.16665	0.16733	0.16853	0.16986	0.17074	0.17101	0.17127	0.17187	0.17286	0.17402	0.175	0.17578	0.17642	0.1769	0.17745	0.17829
40	0.1418	0.14198	0.14258	0.14265	0.14218	0.14301	0.14386	0.14394	0.14394	0.14523	0.14635	0.14689	0.14755	0.14865	0.14929	0.1493	0.1496	0.15056	0.15114	0.15088	0.15092	0.15144	0.15219	0.15295	0.15366	0.15461	0.15602	0.15746	0.15806	0.15816	0.15827	0.15868	0.15956	0.16057	0.16148	0.16251	0.16338	0.16417	0.16517	0.16567	0.16584	0.16649	0.16793	0.16913	0.16994	0.1706	0.17156	0.17245	0.17293
41	0.13511	0.13534	0.13534	0.13574	0.13664	0.13681	0.13669	0.13737	0.13875	0.13948	0.13995	0.14017	0.14028	0.14119	0.14236	0.14347	0.14488	0.14597	0.1462	0.14595	0.1463	0.14728	0.14852	0.14954	0.15013	0.15074	0.1516	0.15248	0.1531	0.1534	0.15359	0.1541	0.15515	0.15625	0.15704	0.15805	0.15959	0.16103	0.16175	0.16253	0.16354	0.16436	0.16468	0.16539	0.1665	0.16754	0.16824	0.16892	0.16961
42	0.12491	0.12521	0.12446	0.12387	0.12443	0.12539	0.12607	0.12669	0.12719	0.1271	0.12753	0.12848	0.12916	0.12928	0.12932	0.12981	0.13071	0.13089	0.13089	0.13156	0.13257	0.13303	0.13343	0.13438	0.13522	0.136	0.13695	0.13798	0.13841	0.13883	0.13957	0.14009	0.14037	0.14078	0.14139	0.14196	0.14303	0.14432	0.1452	0.14587	0.14662	0.14719	0.14718	0.14772	0.14875	0.14959	0.15002	0.15076	0.15163
43	0.13165	0.13033	0.13089	0.13244	0.13361	0.13398	0.13376	0.13399	0.13502	0.13557	0.13597	0.13684	0.13814	0.13863	0.13869	0.13909	0.13995	0.14061	0.14138	0.14222	0.14212	0.14211	0.14293	0.14398	0.1439	0.14428	0.14583	0.14757	0.14789	0.14772	0.14836	0.14985	0.15077	0.151	0.15127	0.15228	0.15358	0.15463	0.15529	0.156	0.15683	0.15767	0.15837	0.15906	0.15994	0.16097	0.1619	0.16249	0.16292
44	0.13715	0.1358	0.1354	0.13717	0.1392	0.13878	0.13803	0.13796	0.13843	0.13871	0.13865	0.13908	0.14068	0.14258	0.14344	0.14332	0.14379	0.1446	0.14503	0.14517	0.14568	0.14666	0.14773	0.14813	0.14782	0.14816	0.14918	0.14998	0.15042	0.15082	0.15147	0.15232	0.15307	0.15358	0.154	0.15475	0.15584	0.15708	0.15825	0.159	0.15953	0.16017	0.16095	0.16145	0.16212	0.16314	0.16381	0.1639	0.16414
45	0.12054	0.12097	0.12245	0.12358	0.12321	0.12238	0.12272	0.12435	0.12629	0.12721	0.12624	0.12514	0.12619	0.128	0.12878	0.12883	0.12979	0.13061	0.13088	0.13094	0.13127	0.13209	0.13314	0.13388	0.13451	0.13542	0.13617	0.13646	0.13706	0.13798	0.13872	0.13859	0.1387	0.13982	0.14145	0.14225	0.14298	0.14386	0.14462	0.14551	0.14645	0.1472	0.14789	0.14871	0.14954	0.15038	0.15109	0.15169	0.15248
46	0.16554	0.16722	0.16835	0.16852	0.16826	0.16823	0.16793	0.16789	0.16877	0.16961	0.16986	0.17001	0.17055	0.17102	0.17157	0.17217	0.17275	0.17333	0.1743	0.17578	0.17694	0.17735	0.17762	0.17825	0.17872	0.17946	0.18019	0.18026	0.18018	0.18082	0.18196	0.18259	0.18325	0.18424	0.18541	0.18651	0.18717	0.18756	0.18828	0.1892	0.18978	0.19031	0.19134	0.1923	0.19309	0.19385	0.19466	0.19517	0.19564
47	0.13091	0.13314	0.13345	0.13263	0.1324	0.13344	0.13416	0.13393	0.13321	0.13313	0.13457	0.13613	0.13594	0.13547	0.13604	0.13727	0.13773	0.13757	0.13794	0.13939	0.14061	0.14096	0.14122	0.14202	0.14282	0.14335	0.14347	0.14352	0.14447	0.14599	0.14705	0.14689	0.14672	0.14741	0.14877	0.14995	0.1506	0.15106	0.15202	0.1532	0.15393	0.15436	0.15505	0.15578	0.15657	0.15739	0.15803	0.15883	0.15982
48	0.13467	0.13403	0.13383	0.13424	0.1349	0.13589	0.13621	0.136	0.13626	0.13722	0.13796	0.1385	0.13926	0.14024	0.14101	0.14114	0.14095	0.14131	0.14165	0.1416	0.14189	0.14324	0.14513	0.14639	0.14658	0.14669	0.14763	0.1494	0.1503	0.15028	0.15027	0.1508	0.15165	0.15267	0.15342	0.15359	0.15414	0.15514	0.15616	0.15721	0.15808	0.15868	0.15928	0.16014	0.16101	0.16181	0.16276	0.16361	0.16434
49	0.1289	0.12944	0.12997	0.13007	0.12979	0.13001	0.13078	0.13193	0.13281	0.132	0.13152	0.13247	0.13351	0.13324	0.13332	0.13435	0.13543	0.13636	0.13669	0.13651	0.13651	0.13735	0.1387	0.13964	0.14011	0.14072	0.14151	0.14215	0.14266	0.14283	0.14289	0.14341	0.14421	0.14499	0.14575	0.14696	0.14781	0.14806	0.14838	0.14945	0.15073	0.15171	0.15222	0.15242	0.15286	0.15374	0.15463	0.15534	0.15596
50	0.13884	0.13868	0.13958	0.14081	0.14086	0.13959	0.13886	0.13939	0.14072	0.14157	0.14242	0.14372	0.14491	0.14518	0.14522	0.14555	0.1464	0.14741	0.14745	0.14677	0.14731	0.14891	0.15055	0.15143	0.15149	0.1522	0.1537	0.15449	0.1542	0.15459	0.15597	0.15669	0.15681	0.15702	0.15781	0.15899	0.16025	0.16138	0.16236	0.1632	0.16414	0.16515	0.16592	0.16659	0.1675	0.16857	0.16928	0.16955	0.16998
51	0.14169	0.1434	0.14499	0.14521	0.14463	0.14515	0.14653	0.14767	0.1479	0.14791	0.1486	0.14997	0.15132	0.15223	0.15271	0.15324	0.15437	0.1552	0.15575	0.1565	0.15727	0.15763	0.15789	0.15839	0.15929	0.16027	0.16088	0.16124	0.16211	0.16287	0.16336	0.16428	0.16568	0.1671	0.16814	0.16877	0.16954	0.17045	0.17109	0.17183	0.17297	0.17418	0.17516	0.17621	0.1771	0.17776	0.17845	0.17937	0.18043
52	0.13353	0.13315	0.13254	0.13287	0.13426	0.13506	0.13466	0.13397	0.13397	0.13449	0.13496	0.13551	0.13663	0.13713	0.1366	0.13626	0.13752	0.1394	0.14039	0.13999	0.13958	0.14071	0.14202	0.14186	0.14148	0.14214	0.14347	0.14435	0.14486	0.14518	0.14559	0.14617	0.1461	0.1459	0.14646	0.1475	0.14852	0.14938	0.14998	0.15048	0.15134	0.15211	0.15212	0.15198	0.15243	0.15359	0.15458	0.15518	0.15565
53	0.138	0.13857	0.13822	0.13838	0.14008	0.14184	0.14224	0.142	0.14207	0.14204	0.1428	0.1445	0.14613	0.14582	0.14479	0.14482	0.14615	0.14708	0.1475	0.14792	0.14855	0.14938	0.15021	0.15082	0.15114	0.15148	0.15231	0.15357	0.15402	0.1538	0.15396	0.15515	0.15598	0.15647	0.15727	0.15831	0.1592	0.15987	0.16048	0.1614	0.16259	0.16345	0.16365	0.16388	0.16461	0.16583	0.16699	0.16765	0.16796
54	0.1181	0.11854	0.11871	0.1187	0.11901	0.11972	0.12003	0.12043	0.12153	0.12237	0.12234	0.1221	0.12235	0.12217	0.12189	0.12233	0.1238	0.12527	0.12587	0.12563	0.12556	0.12639	0.12758	0.1282	0.12812	0.1285	0.12948	0.13008	0.13018	0.13065	0.13168	0.13259	0.13333	0.13391	0.13442	0.13498	0.13563	0.13633	0.13701	0.13796	0.13904	0.13985	0.14031	0.141	0.14179	0.14241	0.14297	0.14353	0.14417
55	0.1412	0.14213	0.14225	0.14145	0.14073	0.14156	0.14309	0.14373	0.14319	0.14312	0.14435	0.14611	0.14676	0.14606	0.14573	0.14679	0.14855	0.1495	0.14943	0.14925	0.14984	0.15084	0.15148	0.1514	0.1516	0.15269	0.15412	0.15498	0.15488	0.15474	0.15544	0.15655	0.15655	0.15629	0.157	0.15833	0.15924	0.15976	0.16059	0.16192	0.16294	0.16326	0.16337	0.1641	0.16511	0.16597	0.16692	0.16743	0.16753
56	0.12653	0.12643	0.12755	0.12879	0.12946	0.12973	0.12959	0.12972	0.13064	0.13166	0.13177	0.13137	0.13173	0.13348	0.13465	0.13442	0.1344	0.1355	0.13692	0.13792	0.13845	0.13856	0.13896	0.13983	0.14013	0.14017	0.14075	0.14221	0.14342	0.14395	0.14421	0.14486	0.14546	0.14587	0.14632	0.1472	0.14826	0.1493	0.15029	0.15127	0.15223	0.15297	0.15324	0.15363	0.15461	0.15585	0.15656	0.15715	0.15773
57	0.11393	0.11447	0.11441	0.11452	0.11529	0.11617	0.11671	0.11688	0.11697	0.1175	0.11858	0.11957	0.11988	0.1199	0.12044	0.12157	0.12253	0.1227	0.12284	0.12348	0.12395	0.12404	0.12431	0.12523	0.12636	0.12729	0.128	0.12886	0.12993	0.13033	0.13017	0.13085	0.13253	0.13393	0.13428	0.13446	0.13485	0.13557	0.13658	0.13759	0.13809	0.13846	0.13953	0.14076	0.14162	0.14215	0.14279	0.14357	0.14424
58	0.12654	0.12609	0.12637	0.12843	0.13082	0.13049	0.12948	0.12975	0.13118	0.13146	0.13206	0.13332	0.13395	0.13379	0.13425	0.13515	0.13512	0.13536	0.13617	0.13714	0.13791	0.13887	0.13975	0.14015	0.14023	0.14033	0.14082	0.14185	0.14301	0.14404	0.14488	0.14545	0.1463	0.14722	0.14771	0.14786	0.14862	0.14974	0.15057	0.15158	0.15245	0.15299	0.15361	0.15462	0.15546	0.15603	0.15707	0.15815	0.15887
59	0.12032	0.12073	0.12066	0.12111	0.12206	0.12204	0.12191	0.12252	0.12381	0.12462	0.12446	0.12371	0.12338	0.1241	0.12503	0.1255	0.12585	0.12693	0.12793	0.12801	0.12775	0.12819	0.12927	0.13025	0.13049	0.13046	0.13114	0.13277	0.1339	0.13419	0.13427	0.13501	0.136	0.13682	0.13735	0.13781	0.13788	0.13785	0.13828	0.139	0.13992	0.14097	0.14185	0.14219	0.14273	0.1437	0.1442	0.14452	0.14511
60	0.13116	0.13124	0.13189	0.13229	0.13236	0.13333	0.13499	0.13624	0.13651	0.13676	0.1375	0.13834	0.13855	0.13824	0.13817	0.1389	0.1403	0.14124	0.14167	0.14219	0.14305	0.14363	0.14434	0.14548	0.14582	0.14557	0.14585	0.14722	0.14846	0.14923	0.14977	0.15057	0.15126	0.15166	0.15207	0.15297	0.15369	0.15425	0.15515	0.15636	0.15744	0.15818	0.15867	0.15908	0.15967	0.16043	0.16118	0.16208	0.163
61	0.13088	0.13258	0.1334	0.13359	0.13382	0.1345	0.13549	0.13573	0.1351	0.13572	0.13768	0.13923	0.13902	0.13916	0.1404	0.14183	0.14223	0.1423	0.14283	0.1439	0.14445	0.14444	0.14468	0.14569	0.14695	0.14805	0.14855	0.14854	0.14929	0.15065	0.15166	0.15171	0.15243	0.15416	0.15603	0.157	0.15727	0.15748	0.15831	0.15975	0.16067	0.16104	0.16197	0.16351	0.16474	0.16528	0.16573	0.16649	0.16748
62	0.13462	0.13508	0.13725	0.13933	0.13972	0.13899	0.13958	0.141	0.14145	0.14077	0.14111	0.14275	0.14392	0.14272	0.14132	0.14195	0.14432	0.14512	0.14457	0.14466	0.14641	0.14722	0.14673	0.14658	0.14781	0.14907	0.14981	0.15038	0.15062	0.15127	0.15242	0.15298	0.15289	0.15324	0.15427	0.15466	0.155	0.15573	0.15682	0.15826	0.15951	0.15987	0.15938	0.15974	0.16081	0.16171	0.16207	0.16269	0.16359
63	0.149	0.14904	0.14964	0.15069	0.15149	0.15162	0.15173	0.15215	0.1529	0.15413	0.15442	0.15388	0.15421	0.15582	0.15714	0.15781	0.15869	0.15946	0.15945	0.15899	0.15995	0.16185	0.16311	0.16314	0.16311	0.16333	0.1641	0.16529	0.16599	0.16647	0.1673	0.16869	0.16966	0.17009	0.17059	0.17186	0.17281	0.17333	0.17419	0.17549	0.17667	0.17763	0.17864	0.17933	0.17989	0.18065	0.18177	0.18265	0.18329
64	0.14394	0.14425	0.14583	0.14709	0.14665	0.1453	0.14533	0.14702	0.149	0.14942	0.14869	0.14845	0.14953	0.15051	0.1514	0.15247	0.15373	0.15478	0.15496	0.15452	0.15493	0.15621	0.15729	0.15755	0.15781	0.1582	0.15886	0.15987	0.16035	0.16084	0.16202	0.16343	0.1639	0.16418	0.16517	0.16669	0.16781	0.16804	0.16789	0.16858	0.16993	0.17127	0.17211	0.17275	0.17362	0.17473	0.17551	0.17578	0.17619
65	0.13988	0.14055	0.14183	0.14247	0.1422	0.14246	0.1444	0.14614	0.14572	0.14505	0.14631	0.14846	0.14941	0.15005	0.15051	0.15056	0.15008	0.15049	0.15191	0.15339	0.15401	0.15459	0.15509	0.15529	0.15637	0.15763	0.15824	0.15853	0.15885	0.15948	0.16086	0.16245	0.16282	0.16302	0.16409	0.16546	0.16655	0.16716	0.16775	0.16898	0.17036	0.17134	0.17186	0.17258	0.17359	0.17456	0.17518	0.17588	0.17682
66	0.13317	0.13382	0.13365	0.13368	0.13392	0.13328	0.13354	0.13492	0.13632	0.1372	0.13804	0.13858	0.13855	0.13845	0.13835	0.13844	0.13902	0.13988	0.14066	0.14109	0.1413	0.14171	0.14243	0.14329	0.1439	0.14457	0.1455	0.14634	0.1466	0.14654	0.14671	0.14756	0.14842	0.14901	0.1497	0.15092	0.1519	0.1523	0.1524	0.15298	0.1539	0.15468	0.15523	0.15597	0.15673	0.15732	0.15781	0.15808	0.15832
67	0.12284	0.12285	0.12284	0.12256	0.12218	0.12262	0.1241	0.12539	0.12551	0.12568	0.12614	0.12651	0.12677	0.12763	0.12803	0.12793	0.12856	0.12939	0.12991	0.13051	0.13212	0.13331	0.1334	0.13296	0.13323	0.13418	0.13536	0.13637	0.137	0.13731	0.13761	0.1382	0.13859	0.13879	0.1392	0.14002	0.14079	0.14147	0.14222	0.14308	0.14392	0.14463	0.14521	0.14571	0.1463	0.14711	0.14806	0.14868	0.14916
68	0.13343	0.13289	0.13219	0.13312	0.13499	0.13535	0.13555	0.13607	0.13668	0.13716	0.13693	0.13646	0.137	0.13934	0.14118	0.1412	0.14071	0.14114	0.14209	0.14288	0.14352	0.14421	0.14487	0.14533	0.14597	0.14694	0.14781	0.14835	0.14936	0.15031	0.15082	0.15138	0.15241	0.15314	0.15331	0.15423	0.1556	0.15664	0.15717	0.15798	0.15874	0.15921	0.15953	0.16026	0.16131	0.16231	0.16324	0.16405	0.16456
69	0.12303	0.12502	0.12693	0.1273	0.12679	0.12723	0.12776	0.12828	0.12884	0.12901	0.12906	0.12928	0.12982	0.13059	0.13142	0.13231	0.13341	0.13426	0.1351	0.13594	0.13584	0.13624	0.1376	0.13881	0.13918	0.13976	0.14061	0.14155	0.14281	0.14384	0.14467	0.14564	0.14617	0.14661	0.14729	0.1478	0.14846	0.14968	0.1513	0.15233	0.15318	0.15408	0.15461	0.15508	0.15583	0.15675	0.15765	0.15877	0.15962
70	0.16288	0.16308	0.16344	0.16429	0.16476	0.16438	0.16503	0.16641	0.16717	0.16703	0.16722	0.16783	0.16802	0.16851	0.16992	0.17124	0.17103	0.17053	0.17127	0.17343	0.17532	0.17563	0.17524	0.17575	0.17728	0.17879	0.17963	0.17998	0.18015	0.1804	0.18071	0.18087	0.18209	0.18386	0.18493	0.18536	0.18619	0.18722	0.18794	0.18839	0.18892	0.18991	0.19117	0.19217	0.19285	0.19327	0.19374	0.19495	0.19624
71	0.15711	0.15667	0.15687	0.15778	0.1585	0.15876	0.15968	0.16073	0.16113	0.16136	0.1614	0.16142	0.16184	0.16271	0.16336	0.16358	0.16373	0.16393	0.16433	0.16509	0.16623	0.16741	0.1683	0.16875	0.16882	0.16899	0.16967	0.17068	0.17091	0.17112	0.17212	0.17348	0.17419	0.17461	0.17521	0.17573	0.17642	0.17703	0.17721	0.17743	0.17843	0.1798	0.1805	0.18117	0.18221	0.18327	0.18374	0.18411	0.18465
72	0.13995	0.13968	0.14057	0.14143	0.14148	0.14272	0.14451	0.14511	0.14448	0.14465	0.14505	0.1455	0.1459	0.1456	0.14603	0.1476	0.14886	0.14869	0.1481	0.14858	0.15049	0.15206	0.15224	0.15178	0.15256	0.15408	0.15534	0.15594	0.15659	0.15741	0.15807	0.15824	0.15851	0.15938	0.1607	0.16169	0.16207	0.16243	0.16347	0.16481	0.16577	0.16628	0.16684	0.16781	0.16906	0.17008	0.17031	0.17046	0.17117
73	0.14575	0.14605	0.14678	0.14745	0.14801	0.14891	0.1493	0.14909	0.14894	0.14964	0.15117	0.15242	0.15235	0.15196	0.15246	0.15359	0.15406	0.15459	0.15575	0.15708	0.1574	0.15768	0.15871	0.16022	0.16094	0.16085	0.16074	0.1614	0.16228	0.16292	0.16354	0.1646	0.16582	0.16686	0.16767	0.16866	0.1697	0.17045	0.17091	0.17164	0.17236	0.17292	0.17361	0.17448	0.17535	0.17617	0.17709	0.17792	0.1786
74	0.14853	0.14924	0.1498	0.15034	0.15125	0.15174	0.15165	0.15176	0.15231	0.15288	0.1535	0.15421	0.15536	0.15652	0.15691	0.15698	0.15751	0.15832	0.15915	0.15964	0.15997	0.16072	0.16173	0.16268	0.1635	0.16397	0.16445	0.16537	0.16624	0.16666	0.16695	0.16798	0.16881	0.16914	0.16968	0.17133	0.17277	0.17367	0.17446	0.17491	0.1751	0.17573	0.17723	0.17845	0.17909	0.17944	0.17982	0.18034	0.1811
75	0.14766	0.14888	0.14829	0.14774	0.14887	0.15066	0.15104	0.15037	0.15017	0.15106	0.15208	0.15259	0.15287	0.15368	0.15485	0.15563	0.15548	0.15546	0.1566	0.15845	0.15911	0.15908	0.1596	0.161	0.16196	0.16237	0.16266	0.16336	0.16474	0.16587	0.16612	0.16608	0.16719	0.16884	0.16984	0.17008	0.17094	0.17248	0.17361	0.17369	0.17383	0.1747	0.17594	0.17701	0.17785	0.1786	0.17932	0.18018	0.18113
76	0.15138	0.15287	0.15374	0.15403	0.15386	0.15365	0.1543	0.15512	0.15529	0.15559	0.15579	0.15592	0.15644	0.15701	0.15725	0.15773	0.15904	0.1602	0.16118	0.16193	0.16189	0.16227	0.16334	0.16428	0.16444	0.16517	0.16651	0.16735	0.16731	0.16745	0.16843	0.16955	0.17008	0.17055	0.17162	0.17302	0.17412	0.17483	0.17546	0.17586	0.17629	0.17711	0.17837	0.17964	0.18073	0.18151	0.1819	0.18233	0.18298
77	0.15283	0.15236	0.15359	0.15549	0.1565	0.15625	0.1559	0.15563	0.15541	0.15606	0.15699	0.15752	0.15791	0.15946	0.1615	0.16277	0.1626	0.16179	0.16179	0.16297	0.16386	0.1642	0.1646	0.16546	0.16642	0.1671	0.16739	0.16771	0.16855	0.16923	0.16958	0.17028	0.17138	0.1726	0.17364	0.17426	0.17499	0.17599	0.17675	0.17682	0.17727	0.17839	0.17943	0.18026	0.18096	0.18159	0.18221	0.18277	0.18334
78	0.15961	0.15938	0.15949	0.15991	0.16075	0.16166	0.16225	0.16249	0.16243	0.16284	0.16434	0.16545	0.16488	0.1649	0.16593	0.16698	0.16706	0.1671	0.16792	0.16939	0.17033	0.17079	0.17151	0.17272	0.17344	0.17424	0.17509	0.17526	0.17534	0.17616	0.17735	0.17789	0.17883	0.18003	0.18081	0.18117	0.18167	0.18237	0.18322	0.18432	0.18512	0.18557	0.18621	0.18739	0.18841	0.18884	0.18931	0.19024	0.1913
79	0.14933	0.15	0.15059	0.15113	0.15206	0.15292	0.15305	0.15306	0.15331	0.15308	0.15331	0.15411	0.15477	0.15544	0.15653	0.15783	0.15876	0.1594	0.15972	0.15994	0.16053	0.16156	0.16244	0.16267	0.16275	0.16345	0.16458	0.16546	0.16632	0.16701	0.16746	0.16795	0.16846	0.16891	0.16957	0.17089	0.17229	0.17341	0.17423	0.17486	0.17557	0.17646	0.17737	0.17826	0.17915	0.17989	0.18029	0.18071	0.18146
80	0.15366	0.15311	0.1533	0.15446	0.15575	0.15627	0.1569	0.15746	0.15747	0.15732	0.15769	0.15861	0.15951	0.15966	0.15958	0.15989	0.16045	0.16095	0.16213	0.164	0.16506	0.16495	0.16464	0.1652	0.16651	0.16746	0.16775	0.16807	0.16866	0.16921	0.16965	0.17018	0.17062	0.1715	0.17279	0.17326	0.17369	0.17474	0.17595	0.17634	0.17673	0.17743	0.17805	0.17883	0.17971	0.18048	0.18105	0.18136	0.18175
81	0.11031	0.11057	0.1117	0.11321	0.11433	0.11456	0.11437	0.11434	0.11462	0.11501	0.11573	0.11667	0.11755	0.1184	0.11881	0.11876	0.11888	0.11938	0.12001	0.12058	0.12112	0.12186	0.123	0.12419	0.12455	0.12453	0.12492	0.12604	0.12713	0.12757	0.12775	0.12876	0.12982	0.12999	0.12966	0.13062	0.1321	0.13311	0.13351	0.13423	0.13523	0.13623	0.13696	0.13753	0.13807	0.13863	0.13922	0.13982	0.14049
82	0.12681	0.12695	0.12637	0.12699	0.12929	0.13112	0.13096	0.12954	0.12869	0.12978	0.13182	0.13301	0.13272	0.13261	0.13337	0.13474	0.13587	0.13684	0.13818	0.13953	0.13943	0.13893	0.13937	0.14093	0.14225	0.14274	0.14275	0.14324	0.1445	0.14553	0.14603	0.14678	0.14762	0.14836	0.14913	0.15026	0.15152	0.15274	0.15373	0.1543	0.15471	0.15539	0.15657	0.15771	0.15842	0.15889	0.15969	0.16069	0.16153
83	0.13714	0.13806	0.13842	0.13887	0.14003	0.14124	0.14121	0.14094	0.14176	0.14257	0.14312	0.14398	0.14517	0.14555	0.14621	0.1475	0.14847	0.14841	0.14847	0.14968	0.15119	0.15164	0.15222	0.15405	0.15514	0.1552	0.15514	0.15561	0.15642	0.15768	0.15883	0.15927	0.15991	0.161	0.16232	0.16354	0.16437	0.16502	0.16595	0.1674	0.16855	0.16913	0.16985	0.17112	0.17225	0.17279	0.17315	0.17378	0.1748
84	0.12316	0.12353	0.12348	0.12365	0.12421	0.12445	0.12502	0.12588	0.1265	0.12691	0.128	0.12912	0.12917	0.12902	0.12969	0.13106	0.13208	0.13294	0.13357	0.1338	0.1339	0.13444	0.13539	0.13648	0.13742	0.13829	0.13916	0.13984	0.14032	0.14102	0.14187	0.14234	0.14296	0.14395	0.14512	0.14615	0.14687	0.14756	0.14865	0.14975	0.15022	0.1504	0.15119	0.15216	0.15326	0.15441	0.15521	0.15583	0.15665
85	0.11767	0.11902	0.11967	0.11957	0.1196	0.12106	0.12173	0.12116	0.12107	0.1229	0.12444	0.12454	0.12366	0.12338	0.12436	0.12577	0.12655	0.12682	0.1272	0.12816	0.12913	0.12897	0.12878	0.12984	0.13113	0.13189	0.13235	0.13312	0.13417	0.13524	0.13592	0.13615	0.13664	0.13762	0.13882	0.13975	0.14044	0.14105	0.14165	0.14249	0.14311	0.14341	0.14407	0.14528	0.14631	0.14686	0.14745	0.14864	0.14998
86	0.13121	0.13276	0.13353	0.13379	0.13448	0.1361	0.13746	0.1377	0.13726	0.1377	0.13856	0.13907	0.1392	0.14035	0.14194	0.14276	0.14247	0.14226	0.14265	0.14368	0.14516	0.14614	0.14676	0.14769	0.14887	0.149	0.14836	0.14851	0.15003	0.1516	0.15222	0.15234	0.1532	0.15471	0.15604	0.15665	0.15742	0.1587	0.15999	0.16065	0.16125	0.16223	0.16334	0.16407	0.16463	0.16539	0.16649	0.16761	0.16845
87	0.13688	0.13751	0.13792	0.13811	0.1385	0.13935	0.14073	0.14159	0.14126	0.14157	0.14307	0.14451	0.14483	0.1453	0.14589	0.14655	0.14741	0.14812	0.14866	0.14915	0.14956	0.1502	0.15104	0.1517	0.15218	0.15263	0.15319	0.15413	0.15518	0.15589	0.15644	0.15726	0.15805	0.15915	0.16061	0.16158	0.16233	0.16321	0.16414	0.16482	0.16573	0.1669	0.16792	0.16865	0.16919	0.16987	0.17092	0.17204	0.17304
88	0.13659	0.13894	0.14007	0.1399	0.1397	0.14013	0.1404	0.14074	0.14148	0.14245	0.14372	0.14471	0.14497	0.1454	0.14632	0.14745	0.14824	0.14889	0.14948	0.14998	0.1504	0.15095	0.15178	0.1529	0.15393	0.15461	0.15513	0.15572	0.15628	0.15689	0.15762	0.15843	0.15945	0.16063	0.16174	0.16249	0.16314	0.16413	0.16555	0.16664	0.16726	0.16789	0.16901	0.17024	0.17123	0.17186	0.17236	0.17303	0.17391
89	0.11744	0.11754	0.11846	0.11907	0.11914	0.12031	0.12082	0.12058	0.12094	0.12192	0.12188	0.12162	0.12261	0.12385	0.1247	0.12507	0.12557	0.12667	0.12768	0.128	0.12798	0.12863	0.12982	0.13065	0.13074	0.13085	0.13139	0.13222	0.13283	0.13314	0.13345	0.13412	0.13497	0.136	0.13711	0.13792	0.13864	0.13968	0.14108	0.14206	0.14252	0.14287	0.14349	0.14421	0.14506	0.14611	0.14738	0.14821	0.14848
90	0.1238	0.12357	0.12405	0.12532	0.12664	0.1271	0.12639	0.12585	0.12662	0.12763	0.12805	0.12862	0.1302	0.13128	0.13134	0.13102	0.13134	0.13294	0.13486	0.13557	0.13457	0.13449	0.13575	0.13695	0.13707	0.13716	0.13797	0.13933	0.14058	0.14085	0.1405	0.14107	0.14262	0.14385	0.14416	0.14472	0.1461	0.14775	0.14873	0.14899	0.14936	0.15025	0.15132	0.15182	0.15227	0.15327	0.15451	0.15526	0.15571
91	0.12919	0.1294	0.12885	0.12863	0.12974	0.13124	0.13216	0.13264	0.13287	0.13246	0.13303	0.13423	0.13445	0.13419	0.1348	0.13631	0.13769	0.13871	0.13918	0.13938	0.13988	0.14078	0.14175	0.14249	0.14332	0.14415	0.14471	0.14507	0.14563	0.14621	0.14677	0.14752	0.14821	0.149	0.15004	0.15102	0.15188	0.15275	0.1536	0.15417	0.1548	0.15565	0.15655	0.15779	0.15903	0.15979	0.16013	0.16041	0.16089
92	0.11604	0.11618	0.11699	0.11727	0.11691	0.11827	0.11909	0.11835	0.11769	0.11979	0.12166	0.12221	0.1227	0.12355	0.12374	0.12336	0.12365	0.12455	0.12556	0.12628	0.12678	0.12738	0.12826	0.12925	0.12996	0.13047	0.131	0.1318	0.13332	0.13474	0.13533	0.13551	0.13629	0.13713	0.13747	0.13795	0.13886	0.13995	0.14082	0.14132	0.14194	0.14308	0.14448	0.14537	0.14591	0.14645	0.14704	0.14792	0.14893
93	0.12627	0.1268	0.12691	0.12698	0.12714	0.12715	0.12793	0.12913	0.12983	0.13058	0.1317	0.13241	0.13233	0.13247	0.13306	0.13367	0.13346	0.13351	0.13478	0.13659	0.13735	0.13809	0.13892	0.13957	0.1405	0.14165	0.14272	0.14359	0.14421	0.14469	0.14528	0.1461	0.14674	0.14747	0.14841	0.14889	0.14935	0.15049	0.15228	0.15347	0.15405	0.15449	0.15522	0.15633	0.15766	0.15883	0.15951	0.16006	0.16077
94	0.12035	0.12014	0.12147	0.12242	0.12242	0.12388	0.12575	0.1267	0.12667	0.12679	0.12651	0.12606	0.12604	0.12648	0.12763	0.12896	0.12942	0.12947	0.13007	0.13131	0.13222	0.13281	0.13326	0.13378	0.13461	0.13569	0.13654	0.13688	0.13784	0.13945	0.14079	0.14107	0.14121	0.14157	0.14223	0.14331	0.14457	0.14548	0.14593	0.14683	0.14798	0.14881	0.14926	0.15001	0.151	0.15193	0.15271	0.15339	0.15416
95	0.11546	0.11544	0.11607	0.11641	0.11645	0.11765	0.11851	0.11862	0.11875	0.11946	0.1202	0.12098	0.12201	0.12275	0.12239	0.12151	0.12192	0.12322	0.12391	0.1241	0.12586	0.12746	0.12774	0.12738	0.12828	0.12952	0.13021	0.13038	0.13092	0.13203	0.13333	0.13428	0.13462	0.13491	0.13565	0.13632	0.13682	0.13748	0.13842	0.13935	0.14047	0.14154	0.14217	0.14281	0.1436	0.1444	0.14506	0.14563	0.14619
96	0.14503	0.14633	0.14799	0.14825	0.14709	0.14726	0.14852	0.14927	0.14891	0.14876	0.14929	0.1505	0.15164	0.15207	0.1521	0.15224	0.15301	0.15399	0.15473	0.15558	0.15729	0.15817	0.15816	0.15836	0.15918	0.15967	0.16007	0.16134	0.16289	0.16359	0.16342	0.16357	0.16407	0.16483	0.16583	0.16698	0.16776	0.16847	0.16969	0.1712	0.17216	0.1725	0.17307	0.17403	0.17483	0.17535	0.1761	0.17693	0.17773
97	0.13689	0.13894	0.14064	0.14116	0.14114	0.14135	0.14143	0.14188	0.14306	0.14449	0.14506	0.14486	0.14513	0.14623	0.14731	0.148	0.14859	0.14893	0.14927	0.15006	0.15176	0.15304	0.15315	0.15288	0.15407	0.15547	0.15632	0.15711	0.15789	0.15858	0.1593	0.1599	0.16027	0.16106	0.16234	0.16328	0.16447	0.16587	0.16692	0.16753	0.16815	0.1689	0.16967	0.1707	0.17171	0.17255	0.17358	0.17449	0.1752
98	0.14537	0.14561	0.14714	0.14841	0.14877	0.14984	0.15035	0.14962	0.14867	0.14931	0.15064	0.15174	0.15216	0.1519	0.15209	0.15298	0.15364	0.15445	0.15568	0.15678	0.15699	0.15741	0.15828	0.15929	0.16046	0.16105	0.1612	0.16194	0.16319	0.16359	0.16331	0.16405	0.16539	0.16658	0.16732	0.16797	0.16867	0.1695	0.17041	0.17146	0.17237	0.17297	0.17349	0.17431	0.17531	0.17634	0.17731	0.17776	0.17792
99	0.12415	0.12533	0.1254	0.12519	0.12552	0.12564	0.12587	0.1268	0.12811	0.1287	0.12922	0.12965	0.12964	0.12964	0.13024	0.13146	0.13265	0.13286	0.13266	0.13291	0.13357	0.13407	0.13477	0.13605	0.13735	0.13801	0.13825	0.13878	0.13951	0.14015	0.14082	0.14192	0.14276	0.14324	0.14379	0.1448	0.1454	0.14576	0.14667	0.14773	0.14855	0.14936	0.15037	0.15076	0.15115	0.1521	0.15313	0.15373	0.15415
100	0.14975	0.14947	0.14888	0.14927	0.15054	0.15094	0.15068	0.1508	0.15176	0.15226	0.15307	0.15456	0.15585	0.15644	0.15672	0.15667	0.15645	0.15744	0.15892	0.15989	0.16045	0.16066	0.16101	0.16199	0.1635	0.16476	0.16533	0.16527	0.16512	0.16509	0.16553	0.16705	0.16899	0.1702	0.17051	0.1711	0.17172	0.17222	0.17277	0.17374	0.17497	0.17601	0.17648	0.17704	0.17795	0.17891	0.17949	0.18018	0.18099
101	0.13927	0.13875	0.13786	0.13881	0.14092	0.14124	0.13991	0.13911	0.14066	0.14291	0.14299	0.14183	0.1423	0.1439	0.14545	0.1462	0.1462	0.14615	0.147	0.1483	0.14826	0.14842	0.14986	0.15185	0.15228	0.15236	0.15304	0.15407	0.15484	0.15514	0.15525	0.15592	0.1576	0.15912	0.15968	0.1601	0.16139	0.16307	0.16394	0.1639	0.16398	0.16481	0.16616	0.16729	0.16796	0.16851	0.16941	0.17042	0.17108
102	0.14016	0.14181	0.14214	0.14103	0.14009	0.14128	0.14368	0.14513	0.14463	0.14421	0.14474	0.14567	0.14628	0.14677	0.14792	0.14969	0.15072	0.15055	0.15046	0.1512	0.15222	0.15304	0.15358	0.15429	0.15552	0.1565	0.15685	0.15674	0.15695	0.15773	0.15882	0.16	0.16121	0.16234	0.16336	0.16418	0.16489	0.16578	0.16686	0.16783	0.16877	0.16964	0.17039	0.17142	0.17244	0.17312	0.17368	0.17439	0.17518
103	0.13464	0.13499	0.13643	0.13825	0.13962	0.14011	0.13956	0.139	0.13951	0.14067	0.14162	0.14233	0.14316	0.14405	0.14483	0.1451	0.14477	0.14529	0.14669	0.14794	0.14828	0.14839	0.1491	0.15071	0.15244	0.1532	0.15313	0.15319	0.15379	0.15473	0.15559	0.1562	0.15672	0.15764	0.15911	0.16044	0.16137	0.16213	0.16295	0.16392	0.16487	0.16552	0.16599	0.16709	0.1684	0.16931	0.16984	0.17048	0.17132
104	0.14011	0.1404	0.14096	0.14103	0.1403	0.14043	0.14169	0.14297	0.14364	0.14384	0.1442	0.14566	0.14762	0.14735	0.14656	0.14685	0.14771	0.14807	0.14842	0.14935	0.15068	0.15167	0.15215	0.15248	0.15288	0.15355	0.1546	0.15565	0.15599	0.15611	0.15653	0.15723	0.15827	0.15927	0.15987	0.16023	0.16111	0.16224	0.16295	0.1636	0.16442	0.16513	0.16558	0.16637	0.1676	0.16883	0.16937	0.16956	0.17
105	0.12933	0.12904	0.12952	0.13	0.12994	0.12975	0.13032	0.13162	0.13265	0.1327	0.13339	0.13455	0.13489	0.13505	0.13617	0.13768	0.13802	0.13824	0.13896	0.13985	0.14023	0.14069	0.14135	0.14191	0.14215	0.14321	0.14491	0.14588	0.14598	0.14626	0.14707	0.14804	0.14884	0.14932	0.14994	0.15133	0.15251	0.15332	0.15428	0.15558	0.15646	0.15681	0.15733	0.1585	0.15963	0.16027	0.16109	0.16215	0.16298
106	0.13531	0.13653	0.13685	0.13713	0.13839	0.13958	0.13946	0.13937	0.14039	0.14101	0.14124	0.14162	0.14255	0.14362	0.14472	0.14574	0.14648	0.14645	0.14658	0.14749	0.14814	0.14821	0.14862	0.14982	0.15088	0.15185	0.1526	0.15301	0.15341	0.15413	0.15513	0.15604	0.15682	0.15756	0.15845	0.15971	0.1609	0.16165	0.16214	0.16297	0.16377	0.16448	0.16551	0.16671	0.16776	0.16859	0.16924	0.16975	0.17044
107	0.13004	0.13117	0.13174	0.13077	0.12967	0.13159	0.13441	0.13532	0.13405	0.13377	0.13414	0.13449	0.13483	0.13532	0.1359	0.13661	0.13725	0.13765	0.13777	0.13771	0.13802	0.139	0.14016	0.14099	0.14135	0.14163	0.14218	0.14282	0.14331	0.1439	0.14455	0.14514	0.14586	0.14634	0.14655	0.14724	0.14805	0.14889	0.15003	0.15126	0.15196	0.15214	0.15226	0.15278	0.15386	0.15503	0.15567	0.15621	0.15677
108	0.12605	0.12506	0.12491	0.12584	0.12679	0.12643	0.12632	0.1272	0.12828	0.12835	0.12832	0.12876	0.12957	0.13015	0.13036	0.13048	0.13086	0.13197	0.13342	0.13438	0.13468	0.1354	0.13618	0.13632	0.13639	0.13705	0.13791	0.13819	0.13861	0.13927	0.13998	0.14085	0.14193	0.14226	0.14178	0.14232	0.14369	0.14503	0.14593	0.14677	0.14753	0.14818	0.14864	0.14872	0.14889	0.14967	0.15108	0.1522	0.15256
109	0.12639	0.12655	0.12674	0.12792	0.12917	0.129	0.12927	0.13026	0.13122	0.1316	0.13145	0.13163	0.13267	0.1335	0.13336	0.13273	0.13298	0.13489	0.13753	0.13909	0.13835	0.13804	0.13927	0.14089	0.14148	0.14224	0.14339	0.14424	0.1449	0.14567	0.14669	0.14778	0.14879	0.14937	0.14965	0.15062	0.15229	0.15368	0.15419	0.15482	0.15586	0.15703	0.15793	0.15872	0.15959	0.16058	0.16153	0.16245	0.16326
110	0.12496	0.12729	0.12752	0.12675	0.12689	0.12783	0.12778	0.12674	0.12622	0.12755	0.12952	0.13031	0.12935	0.12872	0.12991	0.13215	0.13317	0.13294	0.13317	0.13458	0.13554	0.13527	0.13475	0.13526	0.1368	0.13821	0.13874	0.13876	0.13929	0.14038	0.14125	0.1409	0.14064	0.14142	0.14292	0.144	0.14465	0.14501	0.14554	0.14675	0.14764	0.14793	0.14842	0.14969	0.15098	0.15149	0.15134	0.15177	0.15284
111	0.12798	0.12834	0.12866	0.12893	0.12933	0.12958	0.12996	0.13041	0.13037	0.12971	0.13051	0.13222	0.13281	0.13313	0.1342	0.13558	0.13608	0.13623	0.13649	0.13703	0.13745	0.13783	0.13856	0.13966	0.14053	0.14156	0.14266	0.14329	0.14342	0.14376	0.14453	0.14534	0.14619	0.14681	0.14719	0.14799	0.14943	0.15093	0.15199	0.15285	0.1534	0.15375	0.15429	0.15518	0.15615	0.15696	0.15773	0.15829	0.15879
112	0.13179	0.13253	0.1335	0.1342	0.13457	0.13536	0.13579	0.13561	0.13552	0.136	0.13637	0.13715	0.13876	0.13911	0.1388	0.13942	0.14147	0.14262	0.14245	0.14209	0.14301	0.14421	0.14496	0.1455	0.14662	0.14743	0.14764	0.14785	0.14835	0.14888	0.14942	0.15023	0.15083	0.15146	0.1525	0.15368	0.15455	0.15538	0.15649	0.15752	0.15826	0.15872	0.15916	0.1598	0.16057	0.16126	0.16183	0.16249	0.16328
113	0.13142	0.13143	0.13142	0.13187	0.13254	0.13232	0.13296	0.13446	0.13545	0.13566	0.13625	0.13678	0.13653	0.13659	0.13739	0.13866	0.13957	0.14001	0.14054	0.14141	0.14213	0.14227	0.14217	0.14252	0.14349	0.14424	0.14455	0.14501	0.1464	0.14754	0.14761	0.14756	0.1484	0.14972	0.15075	0.15107	0.15137	0.15235	0.1537	0.15429	0.15483	0.15568	0.15644	0.1573	0.15827	0.15905	0.15934	0.15986	0.16054
114	0.14272	0.14259	0.14451	0.14548	0.14434	0.1435	0.14459	0.14683	0.148	0.14709	0.14639	0.14704	0.14825	0.14856	0.14858	0.14974	0.15253	0.1537	0.15274	0.15157	0.15226	0.15356	0.15448	0.15479	0.1551	0.15642	0.15809	0.15851	0.15782	0.15793	0.15939	0.16064	0.16082	0.16086	0.16184	0.16355	0.16453	0.16467	0.16503	0.16602	0.16676	0.16704	0.16748	0.16841	0.16954	0.1705	0.17138	0.17208	0.17261
115	0.13322	0.13387	0.13431	0.13433	0.13436	0.135	0.1366	0.13812	0.13826	0.13764	0.1381	0.13918	0.13941	0.13945	0.13995	0.14079	0.14127	0.14159	0.14212	0.14284	0.14321	0.14405	0.14528	0.14609	0.14608	0.14662	0.14786	0.14884	0.14941	0.15024	0.1513	0.15169	0.15171	0.15211	0.15309	0.15398	0.15472	0.15547	0.15634	0.15737	0.15842	0.15922	0.15961	0.16016	0.16105	0.16202	0.16267	0.16333	0.16393
116	0.13606	0.13635	0.13716	0.13815	0.13882	0.13911	0.13932	0.13961	0.14009	0.14082	0.14165	0.14218	0.14223	0.14288	0.14415	0.14523	0.14568	0.14611	0.14691	0.14809	0.14889	0.14907	0.14966	0.15105	0.15139	0.15126	0.15173	0.15304	0.15429	0.15534	0.1561	0.15663	0.15709	0.15775	0.15869	0.15943	0.1604	0.16191	0.16342	0.16405	0.16454	0.1653	0.16612	0.16708	0.16823	0.16935	0.16996	0.17017	0.17041
117	0.16571	0.16544	0.16593	0.16638	0.16639	0.16703	0.16789	0.16859	0.16927	0.17036	0.17089	0.17118	0.17216	0.17274	0.17295	0.17362	0.17499	0.17559	0.17584	0.17636	0.17684	0.17755	0.17866	0.17991	0.18071	0.18125	0.18173	0.18225	0.18302	0.18399	0.18497	0.18589	0.18655	0.18735	0.18862	0.18976	0.19013	0.1904	0.19139	0.19249	0.19349	0.1945	0.19564	0.19632	0.19677	0.19751	0.19871	0.19974	0.20051
118	0.15678	0.15713	0.15693	0.15731	0.15851	0.15908	0.15859	0.15833	0.15921	0.1597	0.15971	0.16023	0.1619	0.1638	0.16511	0.16536	0.16491	0.16559	0.16668	0.16692	0.16667	0.16774	0.16973	0.17115	0.17131	0.17101	0.17118	0.17196	0.1729	0.17395	0.17498	0.17584	0.17684	0.17785	0.17857	0.17909	0.18002	0.18127	0.18224	0.1827	0.18329	0.18427	0.18516	0.18589	0.18657	0.18726	0.1881	0.18917	0.19015
119	0.14506	0.14451	0.14473	0.14642	0.14844	0.1486	0.14777	0.14754	0.14874	0.15058	0.15167	0.15111	0.1496	0.15013	0.15184	0.15294	0.15338	0.15448	0.1555	0.15591	0.1562	0.1569	0.15807	0.15905	0.15916	0.15929	0.1599	0.16084	0.16219	0.16302	0.1631	0.16362	0.16489	0.16588	0.16616	0.16675	0.16765	0.16862	0.16946	0.17033	0.17128	0.17229	0.17331	0.17391	0.17432	0.17506	0.17614	0.17682	0.1774
120	0.16397	0.16404	0.1647	0.16523	0.16472	0.1641	0.1658	0.16827	0.16891	0.16833	0.16825	0.16897	0.16974	0.17004	0.17	0.1704	0.17176	0.17371	0.17481	0.17429	0.17345	0.17372	0.17464	0.17546	0.1767	0.17809	0.17921	0.17974	0.17976	0.17989	0.18063	0.18191	0.18261	0.18307	0.18407	0.18518	0.18572	0.1861	0.18692	0.18818	0.18985	0.19111	0.19124	0.19167	0.19277	0.19383	0.19406	0.1946	0.19569
[truncated: 1,952 more columns]

## Sheet: SNV
Samples	400	401	402	403	404	405	406	407	408	409	410	411	412	413	414	415	416	417	418	419	420	421	422	423	424	425	426	427	428	429	430	431	432	433	434	435	436	437	438	439	440	441	442	443	444	445	446	447	448
1	-2.91714	-2.89983	-2.89194	-2.89326	-2.89437	-2.88972	-2.88051	-2.8716	-2.86755	-2.86846	-2.86806	-2.86249	-2.85339	-2.8457	-2.84033	-2.83679	-2.83396	-2.83315	-2.83082	-2.82181	-2.80471	-2.79196	-2.7868	-2.78366	-2.77931	-2.77354	-2.76646	-2.76019	-2.7532	-2.74005	-2.72618	-2.72416	-2.72082	-2.71313	-2.70736	-2.70605	-2.69835	-2.6852	-2.67356	-2.66354	-2.65656	-2.6516	-2.64492	-2.63369	-2.62337	-2.61831	-2.61446	-2.60708	-2.59878
2	-2.93092	-2.93159	-2.92188	-2.90713	-2.90009	-2.90352	-2.90142	-2.89476	-2.89324	-2.89666	-2.88934	-2.87278	-2.86107	-2.85584	-2.85241	-2.84765	-2.84108	-2.83518	-2.83309	-2.83233	-2.82671	-2.81491	-2.80121	-2.79321	-2.79559	-2.79207	-2.77808	-2.76495	-2.75591	-2.7462	-2.73754	-2.73516	-2.73002	-2.72222	-2.71575	-2.71032	-2.69976	-2.68767	-2.68053	-2.67216	-2.66169	-2.65408	-2.65122	-2.64504	-2.63714	-2.62895	-2.61725	-2.60744	-2.60145
3	-2.99722	-2.9818	-2.96852	-2.96535	-2.96842	-2.96474	-2.95391	-2.94768	-2.9531	-2.95289	-2.94002	-2.92685	-2.92624	-2.92389	-2.91807	-2.91112	-2.90254	-2.89631	-2.89263	-2.8861	-2.87211	-2.86363	-2.86465	-2.86761	-2.85903	-2.84443	-2.83227	-2.8242	-2.81399	-2.80347	-2.79551	-2.79142	-2.78784	-2.78151	-2.77344	-2.76813	-2.76037	-2.74914	-2.7379	-2.72748	-2.71625	-2.70644	-2.70154	-2.69643	-2.68796	-2.67744	-2.66896	-2.66202	-2.65425
4	-3.0481	-3.03877	-3.03673	-3.03614	-3.03031	-3.02555	-3.01631	-3.00387	-2.99755	-2.99988	-2.99142	-2.97616	-2.96945	-2.9645	-2.96139	-2.96061	-2.95837	-2.95069	-2.9399	-2.92979	-2.92338	-2.92017	-2.91317	-2.90053	-2.89441	-2.89013	-2.88216	-2.87214	-2.8632	-2.85542	-2.85115	-2.85095	-2.84347	-2.82714	-2.80886	-2.79943	-2.79447	-2.78718	-2.77629	-2.76677	-2.76006	-2.7551	-2.74694	-2.73614	-2.72594	-2.7168	-2.70688	-2.70008	-2.69454
5	-3.01616	-3.01808	-3.01501	-3.00541	-2.99609	-2.99149	-2.98793	-2.98467	-2.9815	-2.97833	-2.97334	-2.96489	-2.95683	-2.96009	-2.96105	-2.95116	-2.94002	-2.93513	-2.92581	-2.90786	-2.89557	-2.8948	-2.89845	-2.89605	-2.88779	-2.87493	-2.86226	-2.85602	-2.85506	-2.85093	-2.84142	-2.83182	-2.82385	-2.81492	-2.80388	-2.79524	-2.78766	-2.77767	-2.76538	-2.75626	-2.74992	-2.74397	-2.73648	-2.72669	-2.71536	-2.70422	-2.69616	-2.69174	-2.68656
6	-3.02624	-3.03841	-3.02788	-3.00393	-2.99263	-3.00258	-3.00383	-2.98963	-2.97476	-2.97862	-2.98403	-2.9735	-2.95109	-2.94433	-2.94529	-2.9394	-2.92394	-2.91351	-2.91313	-2.91602	-2.90887	-2.891	-2.87507	-2.87275	-2.88134	-2.88115	-2.86821	-2.8571	-2.85488	-2.85092	-2.83884	-2.82281	-2.80986	-2.80329	-2.79914	-2.79045	-2.78108	-2.77422	-2.76832	-2.75693	-2.74302	-2.73191	-2.72534	-2.72089	-2.71587	-2.70747	-2.69549	-2.68824	-2.68283
7	-2.94891	-2.95129	-2.96023	-2.96194	-2.95262	-2.94758	-2.94511	-2.93731	-2.92248	-2.91069	-2.90479	-2.90308	-2.90194	-2.90213	-2.89842	-2.8872	-2.87342	-2.86866	-2.86943	-2.86562	-2.85136	-2.84518	-2.84727	-2.84214	-2.82303	-2.80934	-2.80525	-2.80097	-2.79232	-2.783	-2.77815	-2.77796	-2.7734	-2.76493	-2.75685	-2.74791	-2.73527	-2.72462	-2.72091	-2.7154	-2.70665	-2.69819	-2.69239	-2.6826	-2.67004	-2.6593	-2.65312	-2.64656	-2.63886
8	-2.95481	-2.95065	-2.93847	-2.92503	-2.91749	-2.91498	-2.91159	-2.9054	-2.89641	-2.88433	-2.87872	-2.87765	-2.87156	-2.86122	-2.85725	-2.85909	-2.85513	-2.84468	-2.83637	-2.83337	-2.82602	-2.81655	-2.80978	-2.80553	-2.79818	-2.78628	-2.77323	-2.76608	-2.76463	-2.76182	-2.75554	-2.74838	-2.73929	-2.7304	-2.72208	-2.71164	-2.69878	-2.68766	-2.68264	-2.68002	-2.67345	-2.66339	-2.65489	-2.64609	-2.63651	-2.62743	-2.62046	-2.61573	-2.61051
9	-2.99802	-2.99172	-2.98087	-2.97515	-2.97631	-2.97244	-2.9643	-2.95664	-2.95112	-2.94414	-2.93988	-2.93794	-2.93445	-2.93145	-2.92602	-2.91585	-2.90519	-2.8986	-2.8924	-2.883	-2.87069	-2.8642	-2.86236	-2.85615	-2.84472	-2.839	-2.83542	-2.82408	-2.81546	-2.81294	-2.81177	-2.80567	-2.79734	-2.78697	-2.77524	-2.76526	-2.7546	-2.7421	-2.73009	-2.72079	-2.71604	-2.71274	-2.70383	-2.6921	-2.68367	-2.67737	-2.66671	-2.66013	-2.65664
10	-2.9656	-2.95286	-2.94081	-2.93895	-2.94002	-2.93385	-2.9316	-2.92973	-2.92395	-2.92317	-2.9168	-2.90279	-2.8923	-2.8925	-2.89132	-2.8828	-2.8728	-2.86731	-2.86143	-2.85065	-2.84174	-2.84086	-2.83782	-2.82469	-2.81361	-2.80617	-2.79999	-2.79539	-2.79539	-2.79137	-2.7802	-2.76952	-2.76079	-2.75168	-2.7408	-2.731	-2.7214	-2.71346	-2.70856	-2.70425	-2.69573	-2.68338	-2.67241	-2.66466	-2.65624	-2.64634	-2.63948	-2.63517	-2.62988
11	-2.96593	-2.96515	-2.95128	-2.93566	-2.92678	-2.91887	-2.91779	-2.91975	-2.91721	-2.91242	-2.90764	-2.90354	-2.90129	-2.89348	-2.87942	-2.86693	-2.85951	-2.84945	-2.84349	-2.8432	-2.83744	-2.8267	-2.81635	-2.80932	-2.79926	-2.78882	-2.78325	-2.78306	-2.78218	-2.77642	-2.76705	-2.76041	-2.7522	-2.73893	-2.72536	-2.72116	-2.71667	-2.7069	-2.69519	-2.68933	-2.68425	-2.67556	-2.6656	-2.65877	-2.65154	-2.64207	-2.63475	-2.62948	-2.6245
12	-2.98074	-2.97709	-2.98307	-2.98288	-2.96943	-2.95542	-2.94851	-2.94692	-2.94403	-2.93637	-2.93076	-2.93002	-2.92862	-2.91984	-2.90937	-2.90293	-2.90078	-2.89564	-2.88322	-2.86865	-2.86286	-2.86277	-2.86052	-2.85128	-2.83783	-2.83297	-2.83549	-2.83101	-2.81915	-2.81167	-2.8099	-2.80392	-2.79178	-2.77842	-2.77067	-2.76908	-2.76189	-2.74891	-2.73872	-2.73461	-2.72752	-2.71397	-2.69949	-2.69193	-2.68773	-2.68119	-2.67371	-2.66951	-2.6654
13	-2.9641	-2.96726	-2.96085	-2.95045	-2.9459	-2.93783	-2.93225	-2.933	-2.9316	-2.9174	-2.90681	-2.90301	-2.89911	-2.89344	-2.88945	-2.88732	-2.87989	-2.86392	-2.85129	-2.84915	-2.8498	-2.8447	-2.83486	-2.82668	-2.82121	-2.81341	-2.80459	-2.79939	-2.79614	-2.79094	-2.78314	-2.7759	-2.76568	-2.75398	-2.74396	-2.73411	-2.72371	-2.7174	-2.71573	-2.71016	-2.69725	-2.68073	-2.66921	-2.66355	-2.65993	-2.65621	-2.65222	-2.64191	-2.62817
14	-2.93227	-2.9202	-2.91776	-2.91692	-2.9084	-2.89951	-2.89296	-2.88762	-2.88397	-2.8806	-2.87311	-2.8645	-2.85832	-2.85551	-2.85457	-2.84924	-2.83716	-2.83398	-2.83361	-2.82546	-2.81179	-2.80562	-2.80374	-2.79719	-2.78895	-2.78577	-2.78408	-2.77575	-2.76751	-2.76012	-2.75123	-2.74168	-2.73737	-2.72867	-2.71107	-2.7003	-2.69965	-2.6974	-2.6842	-2.67203	-2.66417	-2.65771	-2.649	-2.63852	-2.62906	-2.62373	-2.62157	-2.61652	-2.60725
15	-3.01076	-2.9962	-2.99304	-2.99716	-2.9962	-2.98653	-2.98059	-2.97666	-2.96957	-2.96651	-2.96641	-2.96172	-2.94869	-2.93902	-2.93346	-2.928	-2.92101	-2.91459	-2.90798	-2.90138	-2.89716	-2.89141	-2.88528	-2.88117	-2.87475	-2.86469	-2.8555	-2.85061	-2.84534	-2.83778	-2.83011	-2.82686	-2.82216	-2.81297	-2.80262	-2.79515	-2.785	-2.77408	-2.76738	-2.76297	-2.75722	-2.74707	-2.73175	-2.71853	-2.71106	-2.70722	-2.70272	-2.69698	-2.6895
16	-2.96138	-2.95064	-2.94527	-2.94062	-2.93288	-2.93052	-2.92651	-2.92059	-2.91686	-2.91131	-2.89628	-2.8829	-2.88308	-2.88208	-2.87571	-2.86633	-2.85659	-2.85103	-2.84648	-2.8381	-2.82891	-2.82445	-2.82263	-2.81989	-2.81416	-2.80424	-2.79531	-2.79112	-2.78876	-2.78402	-2.77556	-2.76809	-2.76299	-2.75434	-2.7405	-2.72867	-2.71811	-2.70982	-2.70499	-2.69935	-2.69106	-2.68178	-2.67322	-2.66184	-2.65073	-2.64327	-2.63871	-2.63516	-2.63152
17	-2.94822	-2.94017	-2.9333	-2.92957	-2.92525	-2.91327	-2.90875	-2.91288	-2.91533	-2.91052	-2.90159	-2.89108	-2.88352	-2.88588	-2.88283	-2.86997	-2.86153	-2.85672	-2.84916	-2.83953	-2.83423	-2.82716	-2.82	-2.81558	-2.81096	-2.8037	-2.79565	-2.79084	-2.7873	-2.78239	-2.7768	-2.77307	-2.76276	-2.7494	-2.74086	-2.73595	-2.72898	-2.72034	-2.7117	-2.70159	-2.69334	-2.68696	-2.6795	-2.66919	-2.65947	-2.65358	-2.64906	-2.64278	-2.63551
18	-2.99003	-2.97955	-2.96217	-2.94867	-2.94527	-2.95168	-2.95236	-2.93974	-2.92391	-2.92187	-2.9211	-2.91692	-2.9142	-2.91042	-2.90178	-2.89294	-2.89129	-2.88818	-2.87896	-2.86731	-2.86284	-2.85808	-2.84828	-2.83682	-2.83507	-2.83488	-2.82662	-2.8108	-2.80468	-2.80546	-2.80322	-2.79507	-2.78565	-2.77604	-2.76672	-2.75846	-2.75002	-2.74167	-2.73371	-2.72788	-2.72167	-2.71215	-2.70089	-2.69331	-2.68652	-2.67788	-2.66943	-2.6636	-2.65875
19	-2.96454	-2.97023	-2.97685	-2.97354	-2.9633	-2.95627	-2.9511	-2.948	-2.94541	-2.9388	-2.93269	-2.92897	-2.92597	-2.92318	-2.9177	-2.91025	-2.90612	-2.90353	-2.89805	-2.89019	-2.88575	-2.88068	-2.87437	-2.86703	-2.85462	-2.84469	-2.84087	-2.83704	-2.82753	-2.82018	-2.81812	-2.81594	-2.80871	-2.79888	-2.79185	-2.78771	-2.77934	-2.76838	-2.7601	-2.75297	-2.74397	-2.73249	-2.72091	-2.71605	-2.71471	-2.70964	-2.69816	-2.68854	-2.68275
20	-3.00566	-3.00937	-3.01047	-3.00456	-2.99504	-2.98763	-2.98182	-2.98062	-2.98362	-2.97741	-2.95887	-2.94725	-2.95667	-2.95807	-2.94555	-2.93202	-2.93022	-2.92531	-2.91329	-2.90096	-2.89846	-2.89625	-2.88593	-2.87151	-2.8678	-2.8679	-2.86469	-2.85798	-2.85337	-2.84626	-2.83463	-2.82381	-2.8175	-2.81209	-2.80407	-2.79516	-2.78664	-2.77762	-2.7667	-2.75518	-2.74716	-2.74216	-2.73584	-2.72723	-2.71821	-2.70989	-2.70138	-2.69366	-2.68705
21	-2.96224	-2.95854	-2.96039	-2.95317	-2.93615	-2.9293	-2.92745	-2.92356	-2.91727	-2.91209	-2.90691	-2.90136	-2.8934	-2.88035	-2.87406	-2.87378	-2.86397	-2.84824	-2.84223	-2.84806	-2.84769	-2.84149	-2.83224	-2.82206	-2.81484	-2.81475	-2.81364	-2.80235	-2.79263	-2.78329	-2.77191	-2.76432	-2.76182	-2.75618	-2.74591	-2.73998	-2.73092	-2.71935	-2.71139	-2.70593	-2.69705	-2.68539	-2.67586	-2.66698	-2.65902	-2.65301	-2.64903	-2.6419	-2.63247
22	-2.95473	-2.94439	-2.92499	-2.91614	-2.9236	-2.93026	-2.92658	-2.91395	-2.90152	-2.89983	-2.90749	-2.90958	-2.89526	-2.88074	-2.87328	-2.86751	-2.85617	-2.84811	-2.84304	-2.83877	-2.83628	-2.83011	-2.81589	-2.79948	-2.80097	-2.80485	-2.79769	-2.78516	-2.78307	-2.78198	-2.77372	-2.76049	-2.74866	-2.74279	-2.73981	-2.73026	-2.71743	-2.70639	-2.69833	-2.69356	-2.68889	-2.68083	-2.67009	-2.65935	-2.6498	-2.64244	-2.63608	-2.62981	-2.62404
23	-2.92923	-2.92647	-2.92944	-2.92901	-2.91928	-2.90837	-2.89578	-2.88657	-2.88636	-2.88509	-2.87599	-2.86815	-2.86762	-2.8599	-2.85281	-2.85259	-2.85683	-2.85588	-2.84688	-2.83576	-2.83185	-2.82497	-2.81216	-2.80009	-2.79491	-2.79025	-2.78295	-2.77427	-2.76898	-2.76464	-2.75522	-2.73892	-2.72441	-2.71806	-2.71923	-2.71986	-2.71235	-2.69859	-2.68525	-2.67604	-2.66969	-2.66292	-2.65403	-2.64365	-2.6355	-2.63159	-2.62873	-2.61952	-2.60735
24	-2.94294	-2.92578	-2.9059	-2.90283	-2.91467	-2.91374	-2.89965	-2.892	-2.89984	-2.89872	-2.88557	-2.87353	-2.87297	-2.87223	-2.8643	-2.85329	-2.84993	-2.84974	-2.84694	-2.8406	-2.8337	-2.82315	-2.81513	-2.81448	-2.81252	-2.80132	-2.78714	-2.78061	-2.77137	-2.76102	-2.75579	-2.75393	-2.74544	-2.73658	-2.73275	-2.72771	-2.71904	-2.70924	-2.70085	-2.68881	-2.67817	-2.67314	-2.66996	-2.6639	-2.65746	-2.65037	-2.63946	-2.62901	-2.62089
25	-2.96497	-2.96255	-2.96414	-2.95976	-2.94393	-2.93136	-2.94141	-2.9551	-2.94886	-2.93126	-2.92242	-2.92586	-2.92791	-2.91804	-2.90556	-2.89858	-2.89579	-2.89588	-2.89066	-2.87875	-2.87418	-2.87148	-2.85938	-2.84019	-2.83284	-2.83042	-2.82511	-2.81543	-2.80649	-2.80332	-2.80304	-2.79643	-2.78516	-2.77734	-2.7752	-2.76961	-2.75676	-2.74009	-2.72696	-2.72212	-2.72044	-2.71467	-2.70266	-2.69363	-2.68953	-2.68506	-2.67268	-2.66029	-2.65275
26	-2.90456	-2.91225	-2.91591	-2.90956	-2.90161	-2.90196	-2.89517	-2.88685	-2.88712	-2.8847	-2.87531	-2.86878	-2.87182	-2.8669	-2.85564	-2.84508	-2.83766	-2.83319	-2.8289	-2.82192	-2.81369	-2.80922	-2.80251	-2.78999	-2.78472	-2.78346	-2.77685	-2.76316	-2.75449	-2.75028	-2.74483	-2.73302	-2.72238	-2.71585	-2.7104	-2.70297	-2.69492	-2.68553	-2.67605	-2.66863	-2.66174	-2.65548	-2.64985	-2.64171	-2.63125	-2.62132	-2.61524	-2.61041	-2.60361
27	-3.03152	-3.03684	-3.03661	-3.03152	-3.02087	-3.00384	-2.99402	-2.98834	-2.97734	-2.95889	-2.94741	-2.94954	-2.95652	-2.95132	-2.94067	-2.93405	-2.93168	-2.92494	-2.91831	-2.91548	-2.90909	-2.89395	-2.88235	-2.88425	-2.88401	-2.86911	-2.84781	-2.83598	-2.83007	-2.82345	-2.81386	-2.80274	-2.79293	-2.78642	-2.78074	-2.76879	-2.75791	-2.7507	-2.74265	-2.73023	-2.71675	-2.70421	-2.69392	-2.6893	-2.68587	-2.67818	-2.66647	-2.65524	-2.64695
28	-3.0406	-3.03177	-3.02145	-3.0161	-3.0146	-3.00737	-2.99602	-2.98682	-2.98504	-2.98888	-2.98719	-2.97997	-2.97424	-2.96195	-2.9458	-2.93492	-2.93088	-2.92722	-2.92638	-2.92656	-2.91981	-2.90864	-2.90057	-2.8986	-2.88846	-2.87129	-2.85946	-2.85824	-2.85289	-2.84379	-2.83478	-2.82811	-2.82136	-2.81263	-2.8039	-2.79902	-2.79123	-2.77837	-2.76467	-2.75444	-2.74824	-2.74252	-2.73173	-2.72074	-2.7122	-2.70423	-2.69644	-2.69062	-2.68452
29	-3.0007	-2.9963	-2.9816	-2.96602	-2.96298	-2.96906	-2.95896	-2.94436	-2.94603	-2.95201	-2.94505	-2.92908	-2.9183	-2.91468	-2.91389	-2.90772	-2.89136	-2.87685	-2.87411	-2.87999	-2.87891	-2.87088	-2.86186	-2.85451	-2.84423	-2.83129	-2.82002	-2.81405	-2.80601	-2.79866	-2.797	-2.79749	-2.78691	-2.7725	-2.7629	-2.75173	-2.74125	-2.73488	-2.73017	-2.71832	-2.7045	-2.6947	-2.69059	-2.68716	-2.67922	-2.66727	-2.65747	-2.6513	-2.64562
30	-2.99327	-2.98968	-2.98639	-2.98039	-2.97583	-2.9861	-2.98523	-2.96683	-2.9492	-2.94862	-2.94097	-2.92828	-2.92799	-2.93041	-2.92354	-2.91037	-2.90417	-2.89652	-2.88896	-2.88577	-2.88286	-2.86853	-2.854	-2.85226	-2.85071	-2.84422	-2.83463	-2.82379	-2.81188	-2.80529	-2.80364	-2.80035	-2.79347	-2.78263	-2.7712	-2.7651	-2.76035	-2.75125	-2.73711	-2.72656	-2.71949	-2.71183	-2.70205	-2.69276	-2.68356	-2.67494	-2.66806	-2.66167	-2.65508
31	-2.95346	-2.95468	-2.96848	-2.96807	-2.94605	-2.92971	-2.93154	-2.94169	-2.94067	-2.92007	-2.89724	-2.88892	-2.89551	-2.89825	-2.89105	-2.88161	-2.88181	-2.88009	-2.87258	-2.86446	-2.86091	-2.85391	-2.84437	-2.83706	-2.83188	-2.82437	-2.81301	-2.80113	-2.79241	-2.78642	-2.78135	-2.77526	-2.76775	-2.76064	-2.75445	-2.74735	-2.73811	-2.72655	-2.71406	-2.70391	-2.69651	-2.69092	-2.68575	-2.67976	-2.67073	-2.66007	-2.65196	-2.64506	-2.63623
32	-2.96837	-2.96437	-2.96767	-2.96338	-2.94581	-2.93133	-2.92844	-2.93014	-2.92704	-2.92036	-2.91397	-2.90938	-2.90438	-2.8963	-2.88462	-2.87524	-2.87693	-2.88372	-2.88242	-2.86975	-2.85767	-2.84948	-2.8434	-2.83611	-2.82713	-2.82223	-2.81974	-2.81036	-2.79159	-2.77662	-2.77213	-2.77043	-2.76264	-2.75196	-2.74488	-2.73989	-2.73499	-2.72891	-2.71962	-2.70924	-2.70165	-2.69427	-2.68299	-2.67341	-2.66672	-2.66083	-2.65364	-2.64496	-2.63717
33	-2.93953	-2.9381	-2.93111	-2.9204	-2.91159	-2.90585	-2.90786	-2.90853	-2.89839	-2.88825	-2.88758	-2.89035	-2.88863	-2.88863	-2.88442	-2.87648	-2.87275	-2.86854	-2.85658	-2.83964	-2.8316	-2.83314	-2.83141	-2.81744	-2.80414	-2.79726	-2.7919	-2.78204	-2.77123	-2.76472	-2.76358	-2.76032	-2.75085	-2.741	-2.73535	-2.73018	-2.72444	-2.71516	-2.70196	-2.69143	-2.68416	-2.6768	-2.66713	-2.66091	-2.65661	-2.6502	-2.6412	-2.63307	-2.62685
34	-3.10434	-3.0858	-3.1	-3.1167	-3.10434	-3.06831	-3.04529	-3.04884	-3.0612	-3.05345	-3.03161	-3.01583	-3.02109	-3.02925	-3.02478	-3.01044	-2.9986	-2.99058	-2.98611	-2.98046	-2.96783	-2.96086	-2.95731	-2.94666	-2.92824	-2.92022	-2.92404	-2.92351	-2.90654	-2.88984	-2.88484	-2.87945	-2.86196	-2.84447	-2.83829	-2.83711	-2.835	-2.82514	-2.80659	-2.79344	-2.78963	-2.78358	-2.76333	-2.7482	-2.74373	-2.74136	-2.72953	-2.71493	-2.70375
35	-2.98139	-2.97058	-2.97118	-2.97828	-2.98098	-2.97538	-2.95927	-2.94426	-2.94346	-2.94847	-2.94066	-2.92665	-2.92315	-2.92325	-2.92195	-2.91455	-2.89904	-2.89504	-2.89984	-2.89754	-2.88303	-2.87412	-2.86832	-2.85831	-2.85101	-2.84631	-2.84201	-2.8351	-2.82029	-2.80378	-2.79438	-2.79318	-2.79618	-2.79678	-2.78937	-2.77747	-2.76746	-2.75666	-2.74245	-2.73174	-2.72444	-2.71873	-2.71313	-2.70413	-2.69372	-2.68642	-2.68321	-2.67401	-2.6612
36	-3.00296	-2.97167	-2.94885	-2.95649	-2.97769	-2.97269	-2.95221	-2.941	-2.94763	-2.94895	-2.93336	-2.91583	-2.9193	-2.93112	-2.92592	-2.90391	-2.89026	-2.88873	-2.88914	-2.88088	-2.86254	-2.8496	-2.85011	-2.85531	-2.84593	-2.83207	-2.82484	-2.82372	-2.81679	-2.80395	-2.79172	-2.78693	-2.78724	-2.78255	-2.76879	-2.75606	-2.74729	-2.73965	-2.73028	-2.71825	-2.70776	-2.70287	-2.70093	-2.69156	-2.67872	-2.66954	-2.66567	-2.65711	-2.64509
37	-2.96167	-2.9316	-2.92316	-2.92901	-2.9237	-2.9065	-2.90337	-2.90705	-2.90488	-2.90542	-2.9065	-2.90369	-2.89406	-2.88195	-2.87135	-2.86302	-2.85739	-2.85198	-2.84701	-2.84539	-2.84712	-2.83835	-2.82332	-2.81347	-2.8085	-2.80093	-2.7913	-2.78481	-2.77778	-2.77204	-2.76761	-2.75928	-2.74911	-2.74067	-2.73407	-2.72758	-2.72196	-2.71395	-2.70281	-2.69578	-2.69091	-2.68312	-2.67068	-2.66365	-2.65976	-2.65283	-2.64407	-2.63336	-2.62103
38	-3.01037	-2.9936	-2.98923	-2.9932	-2.99201	-2.9794	-2.97205	-2.97176	-2.97047	-2.96788	-2.96441	-2.95736	-2.94704	-2.93721	-2.92967	-2.92728	-2.92857	-2.9249	-2.91567	-2.90266	-2.88728	-2.87904	-2.87676	-2.87328	-2.86812	-2.86405	-2.85988	-2.85402	-2.84975	-2.8432	-2.83308	-2.82365	-2.81541	-2.80836	-2.8025	-2.79615	-2.78394	-2.77123	-2.76557	-2.76021	-2.74939	-2.73609	-2.72656	-2.71673	-2.7076	-2.70154	-2.69936	-2.6945	-2.68655
39	-2.99426	-2.99275	-2.99361	-2.98941	-2.97704	-2.96994	-2.96262	-2.95466	-2.94971	-2.94616	-2.93928	-2.93174	-2.92604	-2.91614	-2.90754	-2.90302	-2.89904	-2.89172	-2.88322	-2.87472	-2.86224	-2.85202	-2.84857	-2.84933	-2.84922	-2.84115	-2.8263	-2.81619	-2.8164	-2.81705	-2.81199	-2.80231	-2.78983	-2.78004	-2.77272	-2.75981	-2.7455	-2.73603	-2.73313	-2.73033	-2.72387	-2.71322	-2.70074	-2.6902	-2.6818	-2.67492	-2.66975	-2.66383	-2.6548
40	-2.9995	-2.99763	-2.99136	-2.99063	-2.99554	-2.98687	-2.978	-2.97717	-2.97717	-2.9637	-2.95201	-2.94638	-2.93949	-2.92801	-2.92133	-2.92122	-2.91809	-2.90807	-2.90202	-2.90473	-2.90431	-2.89888	-2.89106	-2.88312	-2.87571	-2.8658	-2.85108	-2.83605	-2.82979	-2.82874	-2.82759	-2.82331	-2.81413	-2.80359	-2.79409	-2.78334	-2.77426	-2.76601	-2.75557	-2.75035	-2.74858	-2.74179	-2.72676	-2.71424	-2.70578	-2.6989	-2.68887	-2.67959	-2.67458
41	-2.95703	-2.95485	-2.95485	-2.95106	-2.94254	-2.94093	-2.94207	-2.93563	-2.92256	-2.91565	-2.9112	-2.90911	-2.90807	-2.89946	-2.88838	-2.87787	-2.86451	-2.85419	-2.85201	-2.85438	-2.85107	-2.84179	-2.83005	-2.82039	-2.8148	-2.80902	-2.80088	-2.79255	-2.78668	-2.78383	-2.78204	-2.77721	-2.76726	-2.75685	-2.74937	-2.7398	-2.72522	-2.71158	-2.70476	-2.69738	-2.68781	-2.68005	-2.67702	-2.6703	-2.65979	-2.64994	-2.64331	-2.63687	-2.63034
42	-2.95818	-2.95467	-2.96344	-2.97035	-2.96379	-2.95256	-2.9446	-2.93735	-2.9315	-2.93255	-2.92752	-2.9164	-2.90844	-2.90704	-2.90657	-2.90084	-2.8903	-2.8882	-2.8882	-2.88036	-2.86854	-2.86315	-2.85847	-2.84736	-2.83753	-2.8284	-2.81728	-2.80523	-2.8002	-2.79528	-2.78662	-2.78054	-2.77726	-2.77246	-2.76532	-2.75865	-2.74613	-2.73104	-2.72074	-2.7129	-2.70412	-2.69745	-2.69757	-2.69125	-2.6792	-2.66937	-2.66433	-2.65567	-2.64549
43	-3.00648	-3.02018	-3.01437	-2.99829	-2.98615	-2.98231	-2.98459	-2.98221	-2.97152	-2.96582	-2.96167	-2.95264	-2.93916	-2.93407	-2.93345	-2.9293	-2.92038	-2.91353	-2.90555	-2.89683	-2.89787	-2.89797	-2.88947	-2.87857	-2.8794	-2.87546	-2.85938	-2.84133	-2.83801	-2.83978	-2.83314	-2.81768	-2.80814	-2.80575	-2.80295	-2.79247	-2.77899	-2.76809	-2.76125	-2.75388	-2.74527	-2.73656	-2.7293	-2.72214	-2.71301	-2.70232	-2.69268	-2.68656	-2.6821
44	-2.95002	-2.96469	-2.96903	-2.9498	-2.92774	-2.93231	-2.94046	-2.94122	-2.93611	-2.93307	-2.93372	-2.92905	-2.91166	-2.89102	-2.88167	-2.88298	-2.87787	-2.86907	-2.86439	-2.86287	-2.85733	-2.84668	-2.83506	-2.83071	-2.83408	-2.83038	-2.8193	-2.81061	-2.80583	-2.80148	-2.79442	-2.78518	-2.77703	-2.77149	-2.76693	-2.75878	-2.74693	-2.73346	-2.72075	-2.7126	-2.70684	-2.69988	-2.69141	-2.68598	-2.6787	-2.66761	-2.66033	-2.65935	-2.65675
45	-2.99382	-2.98953	-2.97477	-2.9635	-2.96719	-2.97547	-2.97208	-2.95582	-2.93648	-2.9273	-2.93697	-2.94795	-2.93747	-2.91942	-2.91164	-2.91114	-2.90157	-2.89339	-2.8907	-2.8901	-2.88681	-2.87863	-2.86816	-2.86078	-2.85449	-2.84542	-2.83794	-2.83505	-2.82906	-2.81989	-2.81251	-2.8138	-2.81271	-2.80154	-2.78528	-2.7773	-2.77002	-2.76124	-2.75366	-2.74479	-2.73541	-2.72793	-2.72105	-2.71287	-2.70459	-2.69622	-2.68914	-2.68315	-2.67527
46	-2.94561	-2.92913	-2.91804	-2.91637	-2.91892	-2.91922	-2.92216	-2.92255	-2.91392	-2.90568	-2.90323	-2.90175	-2.89645	-2.89184	-2.88645	-2.88056	-2.87487	-2.86918	-2.85966	-2.84514	-2.83376	-2.82973	-2.82709	-2.8209	-2.81629	-2.80903	-2.80187	-2.80118	-2.80197	-2.79569	-2.7845	-2.77832	-2.77185	-2.76213	-2.75065	-2.73986	-2.73338	-2.72956	-2.72249	-2.71347	-2.70777	-2.70257	-2.69247	-2.68305	-2.6753	-2.66784	-2.65989	-2.65489	-2.65028
47	-2.98055	-2.95746	-2.95425	-2.96274	-2.96512	-2.95435	-2.94689	-2.94927	-2.95673	-2.95756	-2.94265	-2.92649	-2.92846	-2.93333	-2.92742	-2.91469	-2.90992	-2.91158	-2.90775	-2.89273	-2.8801	-2.87648	-2.87378	-2.8655	-2.85722	-2.85173	-2.85048	-2.84997	-2.84013	-2.82439	-2.81341	-2.81507	-2.81683	-2.80968	-2.7956	-2.78338	-2.77665	-2.77189	-2.76195	-2.74973	-2.74217	-2.73771	-2.73057	-2.72301	-2.71483	-2.70634	-2.69971	-2.69143	-2.68117
48	-2.95421	-2.9608	-2.96286	-2.95864	-2.95184	-2.94165	-2.93836	-2.94052	-2.93784	-2.92796	-2.92035	-2.91479	-2.90697	-2.89688	-2.88895	-2.88762	-2.88957	-2.88587	-2.88237	-2.88288	-2.8799	-2.866	-2.84655	-2.83358	-2.83162	-2.83049	-2.82082	-2.8026	-2.79333	-2.79354	-2.79364	-2.78819	-2.77944	-2.76894	-2.76122	-2.75947	-2.75381	-2.74352	-2.73302	-2.72221	-2.71326	-2.70708	-2.70091	-2.69205	-2.6831	-2.67487	-2.66509	-2.65634	-2.64882
49	-3.06641	-3.05963	-3.05298	-3.05172	-3.05524	-3.05247	-3.04281	-3.02837	-3.01732	-3.02749	-3.03352	-3.02159	-3.00853	-3.01192	-3.01092	-2.99799	-2.98443	-2.97276	-2.96861	-2.97087	-2.97087	-2.96033	-2.94338	-2.93158	-2.92568	-2.91802	-2.9081	-2.90007	-2.89366	-2.89153	-2.89078	-2.88425	-2.8742	-2.86441	-2.85487	-2.83968	-2.82901	-2.82587	-2.82185	-2.80842	-2.79235	-2.78005	-2.77365	-2.77114	-2.76561	-2.75456	-2.74339	-2.73448	-2.72669
50	-2.97017	-2.97176	-2.96283	-2.95062	-2.95013	-2.96273	-2.96997	-2.96471	-2.95152	-2.94308	-2.93465	-2.92175	-2.90994	-2.90726	-2.90686	-2.90359	-2.89515	-2.88513	-2.88473	-2.89148	-2.88612	-2.87025	-2.85397	-2.84524	-2.84465	-2.8376	-2.82272	-2.81488	-2.81775	-2.81388	-2.80019	-2.79305	-2.79186	-2.78977	-2.78193	-2.77022	-2.75772	-2.74651	-2.73678	-2.72845	-2.71912	-2.7091	-2.70146	-2.69481	-2.68578	-2.67516	-2.66812	-2.66544	-2.66117
51	-3.06052	-3.04399	-3.02862	-3.02649	-3.0321	-3.02707	-3.01373	-3.00271	-3.00048	-3.00039	-2.99371	-2.98047	-2.96742	-2.95862	-2.95398	-2.94886	-2.93793	-2.92991	-2.92459	-2.91734	-2.90989	-2.90641	-2.9039	-2.89907	-2.89037	-2.88089	-2.87499	-2.87151	-2.8631	-2.85575	-2.85102	-2.84212	-2.82859	-2.81486	-2.80481	-2.79871	-2.79127	-2.78247	-2.77629	-2.76913	-2.75811	-2.74641	-2.73694	-2.72679	-2.71818	-2.7118	-2.70513	-2.69624	-2.68599
52	-2.98626	-2.99167	-3.00036	-2.99566	-2.97587	-2.96448	-2.97017	-2.98	-2.98	-2.97259	-2.9659	-2.95807	-2.94212	-2.93501	-2.94255	-2.94739	-2.92945	-2.90269	-2.88859	-2.89429	-2.90012	-2.88403	-2.86538	-2.86766	-2.87307	-2.86367	-2.84474	-2.83221	-2.82495	-2.82039	-2.81455	-2.80629	-2.80729	-2.81014	-2.80217	-2.78736	-2.77284	-2.76059	-2.75205	-2.74493	-2.73268	-2.72172	-2.72158	-2.72357	-2.71716	-2.70065	-2.68655	-2.67801	-2.67132
53	-3.0185	-3.01213	-3.01604	-3.01425	-2.99527	-2.97561	-2.97114	-2.97382	-2.97304	-2.97337	-2.96489	-2.9459	-2.92769	-2.93115	-2.94266	-2.94232	-2.92747	-2.91708	-2.91239	-2.9077	-2.90066	-2.89139	-2.88212	-2.87531	-2.87174	-2.86794	-2.85867	-2.84459	-2.83957	-2.84203	-2.84024	-2.82695	-2.81768	-2.8122	-2.80327	-2.79165	-2.78171	-2.77423	-2.76742	-2.75714	-2.74385	-2.73424	-2.73201	-2.72944	-2.72129	-2.70766	-2.69471	-2.68733	-2.68387
54	-2.98443	-2.97947	-2.97755	-2.97766	-2.97416	-2.96615	-2.96265	-2.95813	-2.94572	-2.93624	-2.93658	-2.93929	-2.93646	-2.93849	-2.94166	-2.93669	-2.9201	-2.90351	-2.89673	-2.89944	-2.90023	-2.89086	-2.87743	-2.87044	-2.87134	-2.86705	-2.85599	-2.84922	-2.84809	-2.84278	-2.83116	-2.82089	-2.81253	-2.80599	-2.80023	-2.79391	-2.78657	-2.77867	-2.771	-2.76028	-2.74809	-2.73894	-2.73375	-2.72596	-2.71705	-2.71005	-2.70373	-2.69741	-2.69018
55	-3.02016	-3.00819	-3.00665	-3.01695	-3.02621	-3.01553	-2.99583	-2.9876	-2.99455	-2.99545	-2.97962	-2.95696	-2.94859	-2.9576	-2.96185	-2.94821	-2.92555	-2.91332	-2.91422	-2.91654	-2.90895	-2.89607	-2.88784	-2.88886	-2.88629	-2.87226	-2.85385	-2.84278	-2.84407	-2.84587	-2.83686	-2.82257	-2.82257	-2.82592	-2.81678	-2.79966	-2.78795	-2.78125	-2.77057	-2.75345	-2.74032	-2.7362	-2.73478	-2.72539	-2.71238	-2.70131	-2.68909	-2.68252	-2.68123
56	-3.02412	-3.02523	-3.01278	-2.99899	-2.99154	-2.98854	-2.9901	-2.98865	-2.97843	-2.96709	-2.96586	-2.97031	-2.96631	-2.94685	-2.93385	-2.9364	-2.93662	-2.9244	-2.90861	-2.89749	-2.8916	-2.89038	-2.88593	-2.87626	-2.87292	-2.87248	-2.86603	-2.8498	-2.83635	-2.83046	-2.82757	-2.82034	-2.81367	-2.80911	-2.80411	-2.79433	-2.78254	-2.77098	-2.75997	-2.74908	-2.73841	-2.73018	-2.72718	-2.72284	-2.71195	-2.69816	-2.69027	-2.68371	-2.67726
57	-2.97471	-2.96915	-2.96977	-2.96863	-2.9607	-2.95163	-2.94606	-2.94431	-2.94338	-2.93792	-2.92679	-2.91659	-2.91339	-2.91318	-2.90762	-2.89597	-2.88608	-2.88433	-2.88288	-2.87629	-2.87144	-2.87052	-2.86773	-2.85825	-2.8466	-2.83702	-2.8297	-2.82084	-2.80981	-2.80569	-2.80734	-2.80033	-2.78301	-2.76858	-2.76498	-2.76312	-2.7591	-2.75168	-2.74127	-2.73086	-2.72571	-2.72189	-2.71087	-2.69819	-2.68933	-2.68386	-2.67727	-2.66923	-2.66232
58	-3.01792	-3.02291	-3.0198	-2.99698	-2.97049	-2.97414	-2.98534	-2.98235	-2.9665	-2.9634	-2.95675	-2.94278	-2.9358	-2.93757	-2.93247	-2.9225	-2.92283	-2.92017	-2.9112	-2.90045	-2.89191	-2.88127	-2.87152	-2.86709	-2.8662	-2.86509	-2.85966	-2.84825	-2.83539	-2.82398	-2.81467	-2.80835	-2.79893	-2.78874	-2.7833	-2.78164	-2.77322	-2.76081	-2.75161	-2.74042	-2.73077	-2.72479	-2.71792	-2.70673	-2.69742	-2.6911	-2.67957	-2.6676	-2.65962
59	-2.93584	-2.93081	-2.93167	-2.92615	-2.91449	-2.91473	-2.91633	-2.90884	-2.89301	-2.88307	-2.88503	-2.89424	-2.89829	-2.88945	-2.87804	-2.87227	-2.86797	-2.85472	-2.84245	-2.84147	-2.84466	-2.83926	-2.826	-2.81398	-2.81103	-2.8114	-2.80305	-2.78305	-2.76918	-2.76562	-2.76464	-2.75556	-2.74341	-2.73335	-2.72684	-2.7212	-2.72034	-2.7207	-2.71543	-2.70659	-2.6953	-2.68241	-2.67161	-2.66744	-2.66082	-2.64891	-2.64277	-2.63885	-2.63161
60	-2.95187	-2.95102	-2.94418	-2.93998	-2.93924	-2.92903	-2.91157	-2.89841	-2.89557	-2.89294	-2.88515	-2.87632	-2.87411	-2.87737	-2.8781	-2.87042	-2.85569	-2.8458	-2.84128	-2.8358	-2.82676	-2.82065	-2.81318	-2.80119	-2.79761	-2.80024	-2.79729	-2.78288	-2.76983	-2.76173	-2.75605	-2.74763	-2.74037	-2.73616	-2.73184	-2.72237	-2.7148	-2.70891	-2.69943	-2.6867	-2.67534	-2.66755	-2.6624	-2.65808	-2.65187	-2.64388	-2.63599	-2.62652	-2.61683
61	-3.04577	-3.0289	-3.02076	-3.01888	-3.0166	-3.00985	-3.00003	-2.99764	-3.0039	-2.99774	-2.97829	-2.96291	-2.965	-2.96361	-2.95131	-2.93712	-2.93315	-2.93245	-2.92719	-2.91658	-2.91112	-2.91122	-2.90884	-2.89881	-2.88631	-2.8754	-2.87044	-2.87054	-2.86309	-2.8496	-2.83958	-2.83908	-2.83194	-2.81477	-2.79622	-2.78659	-2.78391	-2.78183	-2.77359	-2.7593	-2.75017	-2.7465	-2.73728	-2.72199	-2.70979	-2.70443	-2.69997	-2.69243	-2.6826
62	-3.00417	-2.99853	-2.97193	-2.94643	-2.94164	-2.95059	-2.94336	-2.92595	-2.92043	-2.92877	-2.9246	-2.9045	-2.89015	-2.90486	-2.92203	-2.9143	-2.88525	-2.87544	-2.88218	-2.88108	-2.85962	-2.84969	-2.8557	-2.85754	-2.84246	-2.82701	-2.81794	-2.81095	-2.80801	-2.80004	-2.78594	-2.77907	-2.78018	-2.77589	-2.76326	-2.75848	-2.75431	-2.74536	-2.732	-2.71434	-2.69902	-2.6946	-2.70061	-2.6962	-2.68308	-2.67204	-2.66763	-2.66003	-2.64899
63	-3.03577	-3.03537	-3.02941	-3.01898	-3.01103	-3.00973	-3.00864	-3.00447	-2.99701	-2.98479	-2.98191	-2.98728	-2.984	-2.968	-2.95488	-2.94822	-2.93947	-2.93182	-2.93192	-2.93649	-2.92695	-2.90807	-2.89555	-2.89525	-2.89555	-2.89336	-2.88571	-2.87388	-2.86693	-2.86216	-2.85391	-2.8401	-2.83046	-2.82618	-2.82121	-2.80859	-2.79915	-2.79399	-2.78544	-2.77252	-2.76079	-2.75125	-2.74122	-2.73436	-2.72879	-2.72124	-2.71011	-2.70137	-2.695
64	-3.05923	-3.05585	-3.03864	-3.02491	-3.0297	-3.04441	-3.04408	-3.02567	-3.0041	-2.99952	-3.00748	-3.01009	-2.99833	-2.98765	-2.97795	-2.9663	-2.95257	-2.94113	-2.93917	-2.94396	-2.9395	-2.92555	-2.91378	-2.91095	-2.90812	-2.90387	-2.89668	-2.88568	-2.88045	-2.87511	-2.86225	-2.84689	-2.84177	-2.83872	-2.82794	-2.81138	-2.79917	-2.79667	-2.7983	-2.79079	-2.77608	-2.76148	-2.75233	-2.74536	-2.73588	-2.72378	-2.71529	-2.71235	-2.70788
65	-3.05559	-3.04897	-3.03631	-3.02998	-3.03265	-3.03008	-3.01089	-2.99368	-2.99784	-3.00446	-2.992	-2.97074	-2.96134	-2.95501	-2.95046	-2.94997	-2.95472	-2.95066	-2.93662	-2.92198	-2.91585	-2.91011	-2.90517	-2.90319	-2.89251	-2.88005	-2.87401	-2.87115	-2.86798	-2.86175	-2.8481	-2.83238	-2.82872	-2.82674	-2.81616	-2.80261	-2.79183	-2.7858	-2.77996	-2.7678	-2.75415	-2.74446	-2.73931	-2.73219	-2.7222	-2.71261	-2.70648	-2.69956	-2.69026
66	-3.01206	-3.0033	-3.00559	-3.00519	-3.00195	-3.01058	-3.00708	-2.98847	-2.9696	-2.95773	-2.94641	-2.93913	-2.93953	-2.94088	-2.94223	-2.94101	-2.93319	-2.9216	-2.91108	-2.90529	-2.90245	-2.89693	-2.88722	-2.87563	-2.8674	-2.85837	-2.84583	-2.8345	-2.831	-2.83181	-2.82952	-2.81806	-2.80646	-2.79851	-2.7892	-2.77276	-2.75954	-2.75415	-2.7528	-2.74498	-2.73258	-2.72206	-2.71465	-2.70467	-2.69443	-2.68647	-2.67986	-2.67622	-2.67299
67	-2.99302	-2.99289	-2.99302	-2.99659	-3.00145	-2.99583	-2.97692	-2.96043	-2.9589	-2.95672	-2.95085	-2.94612	-2.9428	-2.93181	-2.92669	-2.92797	-2.91992	-2.90932	-2.90267	-2.895	-2.87443	-2.85922	-2.85807	-2.8637	-2.86025	-2.84811	-2.83303	-2.82012	-2.81207	-2.80811	-2.80427	-2.79674	-2.79175	-2.7892	-2.78396	-2.77348	-2.76364	-2.75495	-2.74536	-2.73437	-2.72364	-2.71457	-2.70716	-2.70077	-2.69323	-2.68288	-2.67074	-2.66281	-2.65668
68	-3.04518	-3.05134	-3.05934	-3.04872	-3.02737	-3.02326	-3.02097	-3.01503	-3.00807	-3.00259	-3.00522	-3.01058	-3.00442	-2.9777	-2.95669	-2.95646	-2.96206	-2.95715	-2.9463	-2.93728	-2.92997	-2.9221	-2.91456	-2.90931	-2.902	-2.89093	-2.88099	-2.87483	-2.86329	-2.85245	-2.84662	-2.84023	-2.82847	-2.82014	-2.8182	-2.80769	-2.79205	-2.78017	-2.77412	-2.76487	-2.7562	-2.75083	-2.74718	-2.73884	-2.72685	-2.71544	-2.70482	-2.69557	-2.68975
69	-2.94037	-2.93754	-2.9332	-2.92765	-2.92391	-2.92179	-2.91401	-2.9029	-2.89483	-2.89462	-2.89523	-2.8921	-2.88725	-2.87978	-2.86756	-2.85746	-2.85706	-2.85534	-2.85251	-2.84989	-2.84171	-2.82969	-2.8207	-2.81626	-2.80737	-2.80051	-2.79758	-2.79424	-2.79344	-2.79263	-2.78384	-2.76526	-2.75587	-2.75112	-2.74052	-2.7286	-2.72224	-2.7181	-2.71154	-2.70467	-2.69821	-2.69144	-2.68245	-2.67215	-2.66367	-2.6565	-2.64802	-2.64287	-2.63812
70	-3.09155	-3.08917	-3.0849	-3.07481	-3.06922	-3.07374	-3.06602	-3.04963	-3.04061	-3.04227	-3.04001	-3.03277	-3.03051	-3.02469	-3.00795	-2.99227	-2.99477	-3.00071	-2.99192	-2.96627	-2.94382	-2.94014	-2.94477	-2.93872	-2.92055	-2.90262	-2.89264	-2.88849	-2.88647	-2.8835	-2.87982	-2.87792	-2.86343	-2.84241	-2.82971	-2.8246	-2.81474	-2.80251	-2.79396	-2.78862	-2.78232	-2.77057	-2.75561	-2.74373	-2.73566	-2.73067	-2.72509	-2.71072	-2.6954
71	-3.00157	-3.00683	-3.00444	-2.99356	-2.98495	-2.98184	-2.97084	-2.95829	-2.9535	-2.95075	-2.95027	-2.95003	-2.94501	-2.93461	-2.92684	-2.92421	-2.92241	-2.92002	-2.91524	-2.90615	-2.89252	-2.87841	-2.86777	-2.86239	-2.86155	-2.85952	-2.85139	-2.83931	-2.83656	-2.83405	-2.82209	-2.80583	-2.79734	-2.79231	-2.78514	-2.77892	-2.77067	-2.76338	-2.76123	-2.75859	-2.74664	-2.73026	-2.72189	-2.71387	-2.70144	-2.68876	-2.68314	-2.67872	-2.67226
72	-2.97085	-2.97383	-2.964	-2.95449	-2.95394	-2.94023	-2.92044	-2.91381	-2.92078	-2.9189	-2.91447	-2.9095	-2.90508	-2.9084	-2.90364	-2.88629	-2.87236	-2.87424	-2.88076	-2.87545	-2.85434	-2.83699	-2.835	-2.84008	-2.83146	-2.81466	-2.80073	-2.7941	-2.78691	-2.77785	-2.77055	-2.76867	-2.76569	-2.75607	-2.74148	-2.73054	-2.72634	-2.72236	-2.71086	-2.69605	-2.68544	-2.6798	-2.67361	-2.66289	-2.64907	-2.63779	-2.63525	-2.63359	-2.62575
73	-2.98485	-2.98164	-2.97383	-2.96667	-2.96068	-2.95105	-2.94688	-2.94913	-2.95073	-2.94324	-2.92688	-2.91351	-2.91426	-2.91843	-2.91308	-2.901	-2.89597	-2.8903	-2.87789	-2.86367	-2.86025	-2.85725	-2.84623	-2.83008	-2.82238	-2.82335	-2.82452	-2.81746	-2.80805	-2.80121	-2.79457	-2.78324	-2.77019	-2.75906	-2.7504	-2.73981	-2.72869	-2.72067	-2.71575	-2.70794	-2.70024	-2.69425	-2.68687	-2.67756	-2.66826	-2.65949	-2.64965	-2.64077	-2.6335
74	-3.01829	-3.01041	-3.0042	-2.99821	-2.98811	-2.98267	-2.98367	-2.98245	-2.97635	-2.97002	-2.96314	-2.95526	-2.9425	-2.92963	-2.9253	-2.92452	-2.91864	-2.90965	-2.90044	-2.895	-2.89134	-2.88302	-2.87181	-2.86127	-2.85217	-2.84696	-2.84163	-2.83142	-2.82176	-2.8171	-2.81389	-2.80246	-2.79325	-2.78958	-2.78359	-2.76528	-2.7493	-2.73931	-2.73055	-2.72555	-2.72345	-2.71645	-2.69981	-2.68627	-2.67917	-2.67528	-2.67107	-2.6653	-2.65686
75	-3.01222	-2.99923	-3.00551	-3.01137	-2.99934	-2.98028	-2.97623	-2.98337	-2.9855	-2.97602	-2.96516	-2.95973	-2.95675	-2.94812	-2.93566	-2.92736	-2.92896	-2.92917	-2.91703	-2.89733	-2.8903	-2.89062	-2.88509	-2.87018	-2.85996	-2.85559	-2.8525	-2.84505	-2.83036	-2.81832	-2.81566	-2.81609	-2.80427	-2.7867	-2.77605	-2.7735	-2.76434	-2.74794	-2.73591	-2.73506	-2.73357	-2.7243	-2.7111	-2.69971	-2.69076	-2.68278	-2.67511	-2.66595	-2.65584
76	-2.98456	-2.96829	-2.9588	-2.95563	-2.95749	-2.95978	-2.95268	-2.94373	-2.94188	-2.9386	-2.93642	-2.935	-2.92932	-2.9231	-2.92048	-2.91524	-2.90094	-2.88828	-2.87758	-2.86939	-2.86983	-2.86568	-2.854	-2.84374	-2.84199	-2.83402	-2.81939	-2.81022	-2.81066	-2.80913	-2.79843	-2.78621	-2.78042	-2.77529	-2.76361	-2.74833	-2.73632	-2.72857	-2.72169	-2.71732	-2.71263	-2.70368	-2.68992	-2.67606	-2.66416	-2.65565	-2.65139	-2.6467	-2.6396
77	-2.98629	-2.99164	-2.97766	-2.95606	-2.94458	-2.94742	-2.9514	-2.95447	-2.95697	-2.94958	-2.93901	-2.93298	-2.92855	-2.91093	-2.88774	-2.8733	-2.87523	-2.88444	-2.88444	-2.87103	-2.86091	-2.85705	-2.8525	-2.84272	-2.83181	-2.82408	-2.82078	-2.81715	-2.8076	-2.79987	-2.79589	-2.78793	-2.77543	-2.76156	-2.74974	-2.74269	-2.73439	-2.72302	-2.71438	-2.71359	-2.70847	-2.69574	-2.68392	-2.67448	-2.66653	-2.65936	-2.65232	-2.64595	-2.63947
78	-2.98915	-2.99172	-2.99049	-2.9858	-2.97642	-2.96626	-2.95967	-2.95699	-2.95766	-2.95308	-2.93633	-2.92393	-2.9303	-2.93008	-2.91857	-2.90685	-2.90595	-2.90551	-2.89635	-2.87993	-2.86943	-2.8643	-2.85626	-2.84274	-2.8347	-2.82577	-2.81627	-2.81437	-2.81348	-2.80432	-2.79103	-2.785	-2.7745	-2.7611	-2.75239	-2.74837	-2.74279	-2.73497	-2.72548	-2.71319	-2.70426	-2.69923	-2.69208	-2.67891	-2.66752	-2.66271	-2.65746	-2.64708	-2.63524
79	-2.98677	-2.97946	-2.97302	-2.96712	-2.95697	-2.94759	-2.94617	-2.94606	-2.94333	-2.94584	-2.94333	-2.9346	-2.92739	-2.92008	-2.90818	-2.89399	-2.88384	-2.87686	-2.87336	-2.87096	-2.86452	-2.85328	-2.84368	-2.84117	-2.84029	-2.83265	-2.82032	-2.81071	-2.80133	-2.7938	-2.78888	-2.78353	-2.77797	-2.77306	-2.76585	-2.75145	-2.73616	-2.72394	-2.71499	-2.70811	-2.70036	-2.69065	-2.68072	-2.671	-2.66129	-2.65321	-2.64884	-2.64426	-2.63607
80	-2.9459	-2.95234	-2.95011	-2.93655	-2.92146	-2.91538	-2.90801	-2.90146	-2.90134	-2.9031	-2.89877	-2.88801	-2.87748	-2.87573	-2.87667	-2.87304	-2.86649	-2.86064	-2.84684	-2.82497	-2.81257	-2.81386	-2.81749	-2.81094	-2.79562	-2.7845	-2.78111	-2.77737	-2.77047	-2.76404	-2.75889	-2.75269	-2.74755	-2.73725	-2.72217	-2.71667	-2.71164	-2.69936	-2.68521	-2.68065	-2.67609	-2.6679	-2.66065	-2.65153	-2.64123	-2.63223	-2.62556	-2.62194	-2.61738
81	-2.88595	-2.88334	-2.87198	-2.85681	-2.84556	-2.84325	-2.84516	-2.84546	-2.84264	-2.83872	-2.83149	-2.82205	-2.8132	-2.80466	-2.80054	-2.80105	-2.79984	-2.79482	-2.78849	-2.78276	-2.77733	-2.7699	-2.75844	-2.74649	-2.74287	-2.74307	-2.73915	-2.7279	-2.71695	-2.71253	-2.71072	-2.70057	-2.68992	-2.68821	-2.69153	-2.68188	-2.66701	-2.65686	-2.65284	-2.64561	-2.63556	-2.62551	-2.61818	-2.61245	-2.60703	-2.6014	-2.59547	-2.58944	-2.58271
82	-3.06257	-3.06102	-3.06744	-3.06058	-3.03513	-3.01488	-3.01665	-3.03236	-3.04177	-3.02971	-3.00713	-2.99397	-2.99717	-2.99839	-2.98998	-2.97482	-2.96232	-2.95159	-2.93676	-2.92182	-2.92293	-2.92846	-2.92359	-2.90633	-2.89172	-2.8863	-2.88619	-2.88077	-2.86683	-2.85543	-2.8499	-2.8416	-2.8323	-2.82412	-2.8156	-2.80309	-2.78915	-2.77565	-2.7647	-2.75839	-2.75385	-2.74633	-2.73327	-2.72066	-2.7128	-2.7076	-2.69875	-2.68768	-2.67839
83	-2.97424	-2.96595	-2.9627	-2.95865	-2.94819	-2.93729	-2.93756	-2.93999	-2.9326	-2.9253	-2.92034	-2.91259	-2.90187	-2.89844	-2.89249	-2.88087	-2.87213	-2.87267	-2.87213	-2.86122	-2.84761	-2.84356	-2.83833	-2.82184	-2.81201	-2.81147	-2.81201	-2.80778	-2.80048	-2.78912	-2.77876	-2.77479	-2.76903	-2.7592	-2.74731	-2.73631	-2.72883	-2.72297	-2.71459	-2.70152	-2.69116	-2.68593	-2.67944	-2.668	-2.65781	-2.65295	-2.6497	-2.64402	-2.63483
84	-2.92037	-2.91675	-2.91724	-2.91558	-2.9101	-2.90776	-2.90218	-2.89378	-2.88771	-2.88371	-2.87305	-2.8621	-2.86161	-2.86308	-2.85653	-2.84313	-2.83316	-2.82475	-2.81859	-2.81635	-2.81537	-2.81009	-2.8008	-2.79015	-2.78096	-2.77245	-2.76394	-2.7573	-2.7526	-2.74576	-2.73745	-2.73286	-2.72679	-2.71712	-2.70568	-2.69561	-2.68857	-2.68182	-2.67117	-2.66041	-2.65582	-2.65406	-2.64633	-2.63685	-2.6261	-2.61485	-2.60703	-2.60097	-2.59295
85	-2.9783	-2.96458	-2.95797	-2.95899	-2.95868	-2.94384	-2.93703	-2.94282	-2.94374	-2.92513	-2.90947	-2.90846	-2.9174	-2.92025	-2.91029	-2.89595	-2.88802	-2.88528	-2.88141	-2.87165	-2.86179	-2.86342	-2.86535	-2.85457	-2.84146	-2.83373	-2.82905	-2.82123	-2.81055	-2.79967	-2.79276	-2.79042	-2.78544	-2.77547	-2.76327	-2.75382	-2.7468	-2.7406	-2.7345	-2.72596	-2.71966	-2.71661	-2.7099	-2.6976	-2.68712	-2.68153	-2.67553	-2.66344	-2.64981
86	-3.03944	-3.02475	-3.01745	-3.01499	-3.00845	-2.99309	-2.9802	-2.97792	-2.98209	-2.97792	-2.96977	-2.96494	-2.9637	-2.9528	-2.93773	-2.92996	-2.93271	-2.9347	-2.931	-2.92124	-2.90721	-2.89792	-2.89204	-2.88323	-2.87204	-2.87081	-2.87688	-2.87545	-2.86105	-2.84616	-2.84029	-2.83915	-2.831	-2.81668	-2.80408	-2.79829	-2.79099	-2.77886	-2.76663	-2.76038	-2.75469	-2.7454	-2.73488	-2.72796	-2.72265	-2.71545	-2.70502	-2.6944	-2.68644
87	-2.95354	-2.94771	-2.94392	-2.94216	-2.93856	-2.9307	-2.91793	-2.90998	-2.91303	-2.91016	-2.89629	-2.88297	-2.88001	-2.87566	-2.8702	-2.8641	-2.85615	-2.84958	-2.84458	-2.84005	-2.83626	-2.83034	-2.82257	-2.81647	-2.81203	-2.80786	-2.80268	-2.79399	-2.78428	-2.77771	-2.77262	-2.76504	-2.75773	-2.74756	-2.73405	-2.72508	-2.71814	-2.71001	-2.7014	-2.69511	-2.6867	-2.67588	-2.66644	-2.65969	-2.65469	-2.6484	-2.63869	-2.62833	-2.61908
88	-2.92295	-2.90213	-2.89212	-2.89363	-2.8954	-2.89159	-2.8892	-2.88619	-2.87963	-2.87104	-2.85979	-2.85102	-2.84872	-2.84491	-2.83676	-2.82676	-2.81976	-2.814	-2.80877	-2.80435	-2.80063	-2.79575	-2.7884	-2.77848	-2.76936	-2.76334	-2.75873	-2.7535	-2.74854	-2.74314	-2.73667	-2.7295	-2.72047	-2.71001	-2.70018	-2.69354	-2.68778	-2.67901	-2.66643	-2.65678	-2.65129	-2.64571	-2.63579	-2.62489	-2.61612	-2.61054	-2.60612	-2.60018	-2.59239
89	-2.96176	-2.9608	-2.95193	-2.94604	-2.94537	-2.93409	-2.92917	-2.93148	-2.92801	-2.91856	-2.91895	-2.92146	-2.91191	-2.89995	-2.89176	-2.88819	-2.88337	-2.87276	-2.86303	-2.85994	-2.86013	-2.85387	-2.84239	-2.83439	-2.83352	-2.83246	-2.82725	-2.81925	-2.81337	-2.81038	-2.80739	-2.80093	-2.79274	-2.7828	-2.7721	-2.76429	-2.75735	-2.74732	-2.73382	-2.72437	-2.71994	-2.71656	-2.71059	-2.70364	-2.69545	-2.68532	-2.67308	-2.66508	-2.66247
90	-3.00031	-3.00259	-2.99784	-2.98527	-2.97222	-2.96766	-2.97469	-2.98003	-2.97241	-2.96242	-2.95827	-2.95263	-2.937	-2.92631	-2.92572	-2.92888	-2.92572	-2.90989	-2.8909	-2.88387	-2.89377	-2.89456	-2.88209	-2.87022	-2.86903	-2.86814	-2.86013	-2.84668	-2.83431	-2.83164	-2.8351	-2.82946	-2.81413	-2.80196	-2.79889	-2.79335	-2.7797	-2.76338	-2.75368	-2.75111	-2.74745	-2.73865	-2.72806	-2.72311	-2.71866	-2.70877	-2.6965	-2.68908	-2.68463
91	-2.97426	-2.97213	-2.9777	-2.97993	-2.96868	-2.95348	-2.94415	-2.93929	-2.93696	-2.94111	-2.93533	-2.92317	-2.92094	-2.92358	-2.91739	-2.90209	-2.8881	-2.87776	-2.873	-2.87097	-2.86591	-2.85678	-2.84695	-2.83945	-2.83104	-2.82263	-2.81695	-2.8133	-2.80762	-2.80175	-2.79607	-2.78847	-2.78147	-2.77347	-2.76293	-2.75299	-2.74428	-2.73546	-2.72684	-2.72107	-2.71468	-2.70607	-2.69694	-2.68438	-2.67181	-2.6641	-2.66066	-2.65782	-2.65295
92	-2.94754	-2.94618	-2.9383	-2.93558	-2.93908	-2.92585	-2.91788	-2.92508	-2.93149	-2.91108	-2.89289	-2.88755	-2.88278	-2.87452	-2.87267	-2.87637	-2.87355	-2.8648	-2.85498	-2.84798	-2.84311	-2.83728	-2.82872	-2.8191	-2.8122	-2.80724	-2.80208	-2.79431	-2.77953	-2.76572	-2.75998	-2.75823	-2.75065	-2.74248	-2.73918	-2.73451	-2.72566	-2.71506	-2.70661	-2.70174	-2.69572	-2.68463	-2.67102	-2.66237	-2.65712	-2.65187	-2.64613	-2.63757	-2.62775
93	-2.94338	-2.9384	-2.93737	-2.93671	-2.93521	-2.93512	-2.92779	-2.91653	-2.90996	-2.90292	-2.89241	-2.88574	-2.88649	-2.88518	-2.87964	-2.87391	-2.87588	-2.87541	-2.86349	-2.8465	-2.83937	-2.83242	-2.82463	-2.81853	-2.8098	-2.79901	-2.78896	-2.78079	-2.77497	-2.77047	-2.76493	-2.75723	-2.75123	-2.74437	-2.73555	-2.73104	-2.72673	-2.71603	-2.69922	-2.68805	-2.68261	-2.67848	-2.67162	-2.66121	-2.64872	-2.63774	-2.63136	-2.62619	-2.61953
94	-2.98209	-2.98411	-2.97135	-2.96223	-2.96223	-2.94822	-2.93027	-2.92115	-2.92144	-2.92029	-2.92298	-2.9273	-2.92749	-2.92327	-2.91223	-2.89947	-2.89505	-2.89457	-2.88881	-2.87691	-2.86818	-2.86252	-2.8582	-2.85321	-2.84524	-2.83488	-2.82672	-2.82346	-2.81425	-2.7988	-2.78594	-2.78325	-2.78191	-2.77845	-2.77212	-2.76175	-2.74966	-2.74093	-2.73661	-2.72797	-2.71694	-2.70897	-2.70465	-2.69745	-2.68795	-2.67903	-2.67154	-2.66502	-2.65763
95	-3.02034	-3.02056	-3.01356	-3.00978	-3.00933	-2.996	-2.98644	-2.98521	-2.98377	-2.97588	-2.96765	-2.95898	-2.94753	-2.93931	-2.94331	-2.95309	-2.94853	-2.93408	-2.92641	-2.9243	-2.90474	-2.88695	-2.88384	-2.88784	-2.87784	-2.86406	-2.85639	-2.8545	-2.8485	-2.83616	-2.82171	-2.81115	-2.80737	-2.80415	-2.79592	-2.78847	-2.78292	-2.77558	-2.76513	-2.75479	-2.74234	-2.73045	-2.72345	-2.71633	-2.70755	-2.69866	-2.69133	-2.68499	-2.67876
96	-2.96713	-2.95457	-2.93853	-2.93602	-2.94723	-2.94559	-2.93341	-2.92617	-2.92965	-2.9311	-2.92598	-2.91429	-2.90328	-2.89912	-2.89883	-2.89748	-2.89004	-2.88057	-2.87343	-2.86521	-2.8487	-2.8402	-2.84029	-2.83836	-2.83044	-2.82571	-2.82184	-2.80957	-2.7946	-2.78784	-2.78948	-2.78803	-2.7832	-2.77586	-2.7662	-2.75509	-2.74756	-2.7407	-2.72891	-2.71433	-2.70505	-2.70177	-2.69626	-2.68699	-2.67926	-2.67424	-2.66699	-2.65898	-2.65125
97	-3.0294	-3.00869	-2.99151	-2.98626	-2.98646	-2.98434	-2.98353	-2.97899	-2.96707	-2.95262	-2.94686	-2.94888	-2.94616	-2.93504	-2.92413	-2.91716	-2.9112	-2.90777	-2.90433	-2.89635	-2.87918	-2.86625	-2.86514	-2.86787	-2.85584	-2.8417	-2.83312	-2.82513	-2.81726	-2.81028	-2.80301	-2.79695	-2.79321	-2.78523	-2.7723	-2.76281	-2.75078	-2.73664	-2.72603	-2.71987	-2.71361	-2.70603	-2.69825	-2.68785	-2.67765	-2.66916	-2.65876	-2.64956	-2.64239
98	-3.01035	-3.00786	-2.99199	-2.97882	-2.97509	-2.96399	-2.9587	-2.96627	-2.97612	-2.96949	-2.95569	-2.94429	-2.93993	-2.94263	-2.94066	-2.93143	-2.92458	-2.91618	-2.90343	-2.89202	-2.88984	-2.88548	-2.87646	-2.86599	-2.85385	-2.84774	-2.84618	-2.83851	-2.82554	-2.82139	-2.8243	-2.81662	-2.80273	-2.79039	-2.78271	-2.77597	-2.76871	-2.7601	-2.75067	-2.73978	-2.73034	-2.72412	-2.71873	-2.71022	-2.69985	-2.68917	-2.67911	-2.67444	-2.67278
99	-2.9891	-2.97618	-2.97541	-2.97771	-2.9741	-2.97278	-2.97026	-2.96007	-2.94572	-2.93926	-2.93356	-2.92885	-2.92896	-2.92896	-2.92239	-2.90902	-2.89599	-2.89369	-2.89588	-2.89314	-2.88591	-2.88043	-2.87276	-2.85874	-2.8445	-2.83727	-2.83464	-2.82884	-2.82084	-2.81383	-2.80649	-2.79444	-2.78524	-2.77998	-2.77395	-2.76289	-2.75632	-2.75237	-2.7424	-2.73079	-2.72181	-2.71294	-2.70187	-2.6976	-2.69333	-2.68292	-2.67164	-2.66506	-2.66046
100	-3.01901	-3.02216	-3.0288	-3.02441	-3.01012	-3.00562	-3.00855	-3.0072	-2.9964	-2.99077	-2.98166	-2.96489	-2.95038	-2.94374	-2.94059	-2.94116	-2.94363	-2.93249	-2.91584	-2.90493	-2.89863	-2.89627	-2.89233	-2.8813	-2.86431	-2.85014	-2.84373	-2.8444	-2.84609	-2.84643	-2.84148	-2.82437	-2.80255	-2.78893	-2.78545	-2.77881	-2.77183	-2.76621	-2.76002	-2.74911	-2.73527	-2.72357	-2.71828	-2.71198	-2.70174	-2.69094	-2.68442	-2.67665	-2.66754
101	-2.95214	-2.95706	-2.96548	-2.95649	-2.93652	-2.9335	-2.94608	-2.95365	-2.93898	-2.91769	-2.91694	-2.92791	-2.92347	-2.90833	-2.89366	-2.88656	-2.88656	-2.88703	-2.87899	-2.86669	-2.86707	-2.86555	-2.85193	-2.8331	-2.82903	-2.82827	-2.82184	-2.81209	-2.8048	-2.80196	-2.80092	-2.79458	-2.77869	-2.7643	-2.759	-2.75503	-2.74282	-2.72693	-2.71869	-2.71907	-2.71831	-2.71046	-2.69768	-2.68699	-2.68065	-2.67545	-2.66693	-2.65737	-2.65113
102	-3.00107	-2.9847	-2.98142	-2.99244	-3.00177	-2.98996	-2.96614	-2.95175	-2.95671	-2.96088	-2.95562	-2.94639	-2.94034	-2.93548	-2.92406	-2.9065	-2.89628	-2.89797	-2.89886	-2.89152	-2.88139	-2.87326	-2.8679	-2.86085	-2.84865	-2.83892	-2.83545	-2.83654	-2.83445	-2.82671	-2.8159	-2.80419	-2.79218	-2.78097	-2.77084	-2.76271	-2.75566	-2.74683	-2.73611	-2.72649	-2.71716	-2.70852	-2.70108	-2.69086	-2.68074	-2.67399	-2.66843	-2.66139	-2.65355
103	-3.03901	-3.03539	-3.02048	-3.00164	-2.98746	-2.98239	-2.98808	-2.99388	-2.9886	-2.97659	-2.96676	-2.95941	-2.95082	-2.94161	-2.93353	-2.93074	-2.93415	-2.92877	-2.91428	-2.90134	-2.89782	-2.89668	-2.88933	-2.87267	-2.85476	-2.84689	-2.84762	-2.847	-2.84079	-2.83106	-2.82215	-2.81584	-2.81046	-2.80093	-2.78572	-2.77195	-2.76232	-2.75446	-2.74597	-2.73593	-2.7261	-2.71937	-2.7145	-2.70312	-2.68956	-2.68014	-2.67465	-2.66802	-2.65933
104	-3.00805	-3.00471	-2.99825	-2.99745	-3.00586	-3.00436	-2.98984	-2.97509	-2.96737	-2.96506	-2.96091	-2.94409	-2.9215	-2.92461	-2.93371	-2.93037	-2.92046	-2.91631	-2.91228	-2.90156	-2.88623	-2.87482	-2.86929	-2.86549	-2.86088	-2.85315	-2.84105	-2.82895	-2.82503	-2.82365	-2.81881	-2.81074	-2.79876	-2.78723	-2.78032	-2.77617	-2.76603	-2.753	-2.74482	-2.73733	-2.72788	-2.71969	-2.71451	-2.7054	-2.69123	-2.67705	-2.67083	-2.66864	-2.66357
105	-2.97489	-2.97769	-2.97305	-2.96841	-2.96899	-2.97083	-2.96532	-2.95274	-2.94278	-2.9423	-2.93563	-2.92441	-2.92112	-2.91958	-2.90875	-2.89414	-2.89086	-2.88873	-2.88177	-2.87316	-2.86949	-2.86504	-2.85865	-2.85324	-2.85092	-2.84067	-2.82423	-2.81485	-2.81388	-2.81118	-2.80334	-2.79396	-2.78623	-2.78158	-2.77559	-2.76215	-2.75074	-2.7429	-2.73362	-2.72105	-2.71254	-2.70916	-2.70413	-2.69281	-2.68189	-2.6757	-2.66777	-2.65752	-2.64949
106	-3.0543	-3.0419	-3.03864	-3.0358	-3.02299	-3.01089	-3.01211	-3.01302	-3.00265	-2.99635	-2.99401	-2.99015	-2.98069	-2.96982	-2.95863	-2.94826	-2.94074	-2.94104	-2.93972	-2.93047	-2.92386	-2.92315	-2.91898	-2.90678	-2.89601	-2.88615	-2.87852	-2.87435	-2.87029	-2.86297	-2.8528	-2.84355	-2.83562	-2.82809	-2.81905	-2.80624	-2.79414	-2.78651	-2.78153	-2.77309	-2.76496	-2.75774	-2.74727	-2.73507	-2.7244	-2.71596	-2.70935	-2.70416	-2.69715
107	-3.01078	-2.99725	-2.99043	-3.00204	-3.01521	-2.99222	-2.95846	-2.94757	-2.96277	-2.96612	-2.96169	-2.9575	-2.95343	-2.94757	-2.94062	-2.93212	-2.92446	-2.91967	-2.91824	-2.91896	-2.91524	-2.90351	-2.88963	-2.87969	-2.87538	-2.87203	-2.86544	-2.85778	-2.85192	-2.84485	-2.83707	-2.83001	-2.82139	-2.81564	-2.81313	-2.80487	-2.79517	-2.78512	-2.77147	-2.75674	-2.74836	-2.74621	-2.74477	-2.73855	-2.72562	-2.71161	-2.70395	-2.69748	-2.69078
108	-2.99261	-3.00474	-3.00657	-2.99518	-2.98355	-2.98796	-2.98931	-2.97853	-2.96531	-2.96445	-2.96482	-2.95943	-2.94951	-2.94241	-2.93984	-2.93837	-2.93371	-2.92012	-2.90237	-2.89061	-2.88694	-2.87812	-2.86857	-2.86685	-2.866	-2.85792	-2.84738	-2.84396	-2.83881	-2.83073	-2.82204	-2.81138	-2.79816	-2.79412	-2.8	-2.79338	-2.77661	-2.7602	-2.74918	-2.73889	-2.72959	-2.72163	-2.71599	-2.71501	-2.71293	-2.70338	-2.68612	-2.6724	-2.66799
109	-3.03392	-3.03234	-3.03047	-3.01883	-3.00649	-3.00817	-3.00551	-2.99574	-2.98626	-2.98252	-2.984	-2.98222	-2.97196	-2.96377	-2.96515	-2.97137	-2.9689	-2.95005	-2.924	-2.90861	-2.91591	-2.91897	-2.90684	-2.89085	-2.88503	-2.87753	-2.86618	-2.8578	-2.85128	-2.84369	-2.83362	-2.82287	-2.8129	-2.80718	-2.80442	-2.79485	-2.77837	-2.76465	-2.75962	-2.7534	-2.74314	-2.7316	-2.72272	-2.71492	-2.70634	-2.69657	-2.6872	-2.67812	-2.67013
110	-3.03022	-3.0011	-2.99823	-3.00785	-3.0061	-2.99435	-2.99498	-3.00798	-3.01447	-2.99785	-2.97323	-2.96336	-2.97535	-2.98323	-2.96836	-2.94036	-2.92761	-2.93049	-2.92761	-2.90999	-2.89799	-2.90137	-2.90786	-2.90149	-2.88224	-2.86462	-2.858	-2.85775	-2.85112	-2.8375	-2.82663	-2.831	-2.83425	-2.8245	-2.80575	-2.79226	-2.78413	-2.77963	-2.77301	-2.75788	-2.74676	-2.74314	-2.73701	-2.72114	-2.70502	-2.69864	-2.70052	-2.69514	-2.68177
111	-3.02981	-3.02582	-3.02227	-3.01928	-3.01485	-3.01208	-3.00787	-3.00288	-3.00332	-3.01064	-3.00177	-2.98282	-2.97628	-2.97274	-2.96088	-2.94559	-2.94005	-2.93838	-2.9355	-2.92952	-2.92487	-2.92065	-2.91256	-2.90037	-2.89073	-2.87932	-2.86713	-2.86015	-2.85871	-2.85494	-2.84641	-2.83743	-2.82801	-2.82114	-2.81693	-2.80807	-2.79211	-2.77549	-2.76374	-2.75421	-2.74812	-2.74424	-2.73825	-2.72839	-2.71764	-2.70867	-2.70013	-2.69393	-2.68839
112	-3.03244	-3.02404	-3.01303	-3.00508	-3.00088	-2.99191	-2.98703	-2.98907	-2.99009	-2.98464	-2.98044	-2.97159	-2.95331	-2.94933	-2.95285	-2.94581	-2.92254	-2.90948	-2.91141	-2.9155	-2.90505	-2.89143	-2.88291	-2.87678	-2.86406	-2.85487	-2.85248	-2.8501	-2.84442	-2.8384	-2.83227	-2.82308	-2.81626	-2.80911	-2.7973	-2.7839	-2.77403	-2.7646	-2.752	-2.7403	-2.7319	-2.72668	-2.72168	-2.71442	-2.70567	-2.69784	-2.69137	-2.68387	-2.6749
113	-3.0229	-3.02279	-3.0229	-3.01765	-3.00983	-3.0124	-3.00493	-2.98741	-2.97586	-2.97341	-2.96652	-2.96033	-2.96325	-2.96255	-2.95321	-2.93838	-2.92776	-2.92262	-2.91644	-2.90628	-2.89787	-2.89624	-2.89741	-2.89332	-2.882	-2.87324	-2.86962	-2.86425	-2.84803	-2.83472	-2.8339	-2.83448	-2.82468	-2.80927	-2.79724	-2.79351	-2.79001	-2.77857	-2.76281	-2.75592	-2.74961	-2.73969	-2.73082	-2.72078	-2.70946	-2.70035	-2.69696	-2.69089	-2.68296
114	-2.89352	-2.8815	-2.88547	-2.88359	-2.87268	-2.87477	-2.87709	-2.87709	-2.87896	-2.87918	-2.87246	-2.85911	-2.84323	-2.83496	-2.83242	-2.82746	-2.81897	-2.81665	-2.81191	-2.80077	-2.79492	-2.79415	-2.79062	-2.77993	-2.7668	-2.75721	-2.75026	-2.74	-2.72942	-2.72379	-2.72137	-2.71651	-2.71155	-2.70394	-2.69247	-2.68288	-2.67471	-2.66534	-2.65553	-2.652	-2.64758	-2.63898	-2.63093	-2.6242	-2.61505	-2.60513	-2.60171	-2.59895	-2.59079
115	-3.05267	-3.04469	-3.03928	-3.03904	-3.03867	-3.03081	-3.01115	-2.99248	-2.99076	-2.99837	-2.99272	-2.97946	-2.97663	-2.97614	-2.97	-2.95968	-2.95378	-2.94985	-2.94334	-2.93449	-2.92995	-2.91963	-2.90452	-2.89457	-2.89469	-2.88806	-2.87282	-2.86078	-2.85378	-2.84359	-2.83056	-2.82577	-2.82553	-2.82061	-2.80857	-2.79764	-2.78855	-2.77934	-2.76865	-2.756	-2.7431	-2.73327	-2.72848	-2.72172	-2.71079	-2.69887	-2.69089	-2.68278	-2.67541
116	-3.01343	-3.01037	-3.00182	-2.99136	-2.98429	-2.98123	-2.97901	-2.97595	-2.97088	-2.96317	-2.95441	-2.94881	-2.94828	-2.94142	-2.92801	-2.91661	-2.91185	-2.90731	-2.89887	-2.88641	-2.87796	-2.87606	-2.86983	-2.85515	-2.85156	-2.85294	-2.84797	-2.83414	-2.82094	-2.80986	-2.80183	-2.79624	-2.79138	-2.78441	-2.77449	-2.76667	-2.75643	-2.74049	-2.72454	-2.71789	-2.71272	-2.70469	-2.69603	-2.6859	-2.67375	-2.66193	-2.65549	-2.65327	-2.65074
117	-3.04068	-3.04357	-3.03833	-3.03352	-3.03342	-3.02658	-3.01739	-3.00991	-3.00264	-2.99099	-2.98532	-2.98222	-2.97175	-2.96555	-2.96331	-2.95615	-2.94151	-2.93509	-2.93242	-2.92686	-2.92173	-2.91415	-2.90228	-2.88892	-2.88037	-2.8746	-2.86947	-2.86391	-2.85568	-2.84532	-2.83484	-2.82501	-2.81796	-2.80941	-2.79584	-2.78365	-2.7797	-2.77681	-2.76623	-2.75447	-2.74379	-2.73299	-2.72081	-2.71354	-2.70873	-2.70082	-2.688	-2.67699	-2.66876
118	-3.04852	-3.04464	-3.04686	-3.04265	-3.02937	-3.02306	-3.02848	-3.03136	-3.02162	-3.0162	-3.01609	-3.01033	-2.99184	-2.97081	-2.95631	-2.95355	-2.95853	-2.951	-2.93894	-2.93628	-2.93905	-2.9272	-2.90517	-2.88946	-2.88769	-2.89101	-2.88912	-2.88049	-2.87009	-2.85846	-2.84706	-2.83754	-2.82647	-2.81529	-2.80733	-2.80157	-2.79128	-2.77744	-2.7667	-2.76161	-2.75508	-2.74423	-2.73438	-2.7263	-2.71877	-2.71114	-2.70184	-2.68999	-2.67915
119	-3.01926	-3.02538	-3.02293	-3.00412	-2.98163	-2.97985	-2.98909	-2.99165	-2.97829	-2.95781	-2.94568	-2.95191	-2.96872	-2.96282	-2.94379	-2.93154	-2.92664	-2.9144	-2.90304	-2.89848	-2.89525	-2.88746	-2.87443	-2.86353	-2.8623	-2.86085	-2.85406	-2.8436	-2.82857	-2.81933	-2.81844	-2.81265	-2.79852	-2.78749	-2.78438	-2.77781	-2.76779	-2.75699	-2.74764	-2.73796	-2.72738	-2.71614	-2.70479	-2.69811	-2.69354	-2.6853	-2.67328	-2.66571	-2.65926
120	-3.02775	-3.02697	-3.01958	-3.01366	-3.01936	-3.0263	-3.00728	-2.97965	-2.97249	-2.97898	-2.97987	-2.97182	-2.96321	-2.95985	-2.9603	-2.95582	-2.94061	-2.9188	-2.90649	-2.91231	-2.9217	-2.91868	-2.90839	-2.89922	-2.88535	-2.8698	-2.85727	-2.85134	-2.85112	-2.84966	-2.84139	-2.82707	-2.81924	-2.81409	-2.80291	-2.79049	-2.78445	-2.7802	-2.77102	-2.75693	-2.73825	-2.72415	-2.7227	-2.71789	-2.70558	-2.69373	-2.69115	-2.68511	-2.67292
[truncated: 1,952 more columns]
